# Supplementary material for: Enantioselective direct vinylogous aldol-cyclization cascade reaction between β,γ-unsaturated amides and o-quinones
Source: Royal Society of Chemistry journal article supplement (doi:10.1039/c6ob00893c), 2016-01-01
Supplement: c6ob00893c1.pdf [file c6ob00893c1.pdf]

# Supporting Information

## Enantioselective Direct Vinylogous Aldol-Cyclization Cascade Reaction between $\beta,\gamma$ -Unsaturated Amides and *o*-Quinones

Yu Jiang, Jun-Hao Fu, Tian-Ze Li, Feng Sha\*, Xin-Yan Wu\*

*Key Laboratory for Advanced Materials and Institute of Fine Chemicals, East China  
University of Science and Technology, 130 Meilong Road, Shanghai 200237, P. R. China*

*xinyanwu@ecust.edu.cn*

### Table of Contents

|                                                                  |     |
|------------------------------------------------------------------|-----|
| 1. General Information.....                                      | S2  |
| 2. General Procedure and Characterization of the Substrates..... | S2  |
| 3. References.....                                               | S3  |
| 4. Copies of NMR Spectra of the Products.....                    | S5  |
| 5. Copies of NMR Spectra of the Substrates .....                 | S23 |
| 6. Copies of HPLC Spectra of the Products.....                   | S29 |
| 7. The Data for the Deuterium Experiment .....                   | S48 |
| 8. X-ray Analysis of Compound <b>3ca</b> .....                   | S49 |

## 1. General Information

<sup>1</sup>H NMR and <sup>13</sup>C NMR spectra were recorded on Bruker 400 spectrometer and the chemical shifts in ppm downfield from tetramethylsilane ( $\delta$  0.00 ppm) for <sup>1</sup>H NMR and relative to the central CDCl<sub>3</sub> resonance ( $\delta$  77.0 ppm) for <sup>13</sup>C NMR spectroscopy. IR spectra were recorded on Nicolet Magna-I 550 spectrometer. High resolution mass spectra (HRMS) were performed on an electron ionization time-of-flight (EI-TOF) mass spectrometer.

Thin-layer chromatography (TLC) was performed on 10-40  $\mu$ m silica gel plates. Column chromatography was performed using silica gel (300-400 mesh) eluted with petroleum ether and ethyl acetate.

Catalysts **C1-C4**,<sup>1</sup> **C5-C6**,<sup>2</sup> **C7**,<sup>3</sup> and **C8-C10**<sup>4</sup> were prepared according to literature procedures. The *o*-quinones **2d**<sup>5</sup> and **2e**<sup>6</sup> were prepared by the known procedures.

## 2. General Procedure and Characterization of the Substrates

General procedure: Pyrazole (16 mmol) and  $\beta,\gamma$ -unsaturated carboxylic acid (4 mmol) were added to a CH<sub>2</sub>Cl<sub>2</sub> (25 mL) solution of SOCl<sub>2</sub> (4 mmol) at room temperature and stirred for 3 h. The reaction mixture was quenched with 0.1 M HCl (5 mL) and extracted with CH<sub>2</sub>Cl<sub>2</sub>. The organic phase was dried over anhydrous Na<sub>2</sub>SO<sub>4</sub>, then filtered and concentrated under reduced pressure. The crude product was purified by chromatography on silica gel.

Characterization of new substrates:

3-(3-Chlorophenyl)-1-(1*H*-pyrazol-1-yl)but-3-en-1-one (**1g**). Colorless liquid, 74% yield (0.73 g); <sup>1</sup>H NMR (400 MHz, CDCl<sub>3</sub>):  $\delta$  8.23 (d,  $J$  = 2.8 Hz, 1H), 7.75 (s, 1H), 7.47 (s, 1H), 7.35-7.33 (m, 1H), 7.27-7.24 (m, 2H), 6.46-6.45 (m, 1H), 5.63 (s, 1H), 5.34 (s, 1H), 4.35 (s, 2H); <sup>13</sup>C NMR (100 MHz, CDCl<sub>3</sub>):  $\delta$  169.4, 144.2, 141.7, 139.3, 134.4, 129.6, 128.5, 127.9, 126.1, 124.0, 118.3, 110.0, 40.0; IR (KBr, cm<sup>-1</sup>):  $\nu$  2975, 1735, 1635, 1383, 1351, 1191, 1088, 913, 768; HRMS (EI) calcd for C<sub>13</sub>H<sub>11</sub>ClN<sub>2</sub>O 246.0560, found 246.0559.

1-(1*H*-Pyrazol-1-yl)-3-(*o*-tolyl)but-3-en-1-one (**1i**). Colorless liquid, 50% yield (0.45 g); <sup>1</sup>H NMR (400 MHz, CDCl<sub>3</sub>):  $\delta$  8.19 (d,  $J$  = 2.8 Hz, 1H), 7.67 (s, 1H), 7.23-7.21 (m, 1H), 7.18-7.11 (m, 3H), 6.40-6.39 (m, 1H), 5.41 (s, 1H), 5.17 (s, 1H), 4.22 (s, 2H), 2.38 (s, 3H); <sup>13</sup>C NMR (100 MHz, CDCl<sub>3</sub>):  $\delta$  169.3, 143.9, 141.5, 141.3, 135.0, 130.2, 128.4, 128.3, 127.3, 125.5, 119.2, 110.0, 42.2, 19.8; IR (KBr, cm<sup>-1</sup>):  $\nu$  2922, 1735, 1635, 1383, 1351, 1191, 1088, 913, 768; HRMS (EI) calcd for C<sub>14</sub>H<sub>14</sub>N<sub>2</sub>O 226.1106, found 226.1105.

3-(2,4-Dimethylphenyl)-1-(1*H*-pyrazol-1-yl)but-3-en-1-one (**1j**). Yield: 46% (0.44 g), colorless liquid; <sup>1</sup>H NMR (400 MHz, CDCl<sub>3</sub>):  $\delta$  8.19 (d,  $J$  = 2.8 Hz, 1H), 7.67 (s, 1H), 7.12 (d,  $J$  = 7.6 Hz, 1H), 7.00 (s, 1H), 6.95 (d  $J$  = 7.6 Hz, 1H), 6.40-6.39 (m, 1H), 5.39 (d,  $J$  = 1.2 Hz,

1H), 5.16 (s, 1H), 4.21 (s, 2H), 2.35 (s, 3H), 2.29 (s, 3H); <sup>13</sup>C NMR (100 MHz, CDCl<sub>3</sub>): δ 169.4, 143.9, 141.4, 138.4, 136.9, 134.9, 131.0, 128.4, 128.3, 126.2, 119.1, 110.0, 42.4, 21.0, 19.8; IR (KBr, cm<sup>-1</sup>): ν 1709, 1383, 1352, 1199, 913, 823, 770; HRMS (EI) calcd for C<sub>15</sub>H<sub>16</sub>N<sub>2</sub>O 240.1263, found 240.1263.

3-(3,5-Dimethylphenyl)-1-(1*H*-pyrazol-1-yl)but-3-en-1-one (**1k**). Colorless liquid, 74% yield (0.71 g); <sup>1</sup>H NMR (400 MHz, CDCl<sub>3</sub>): δ 8.23 (d, *J* = 2.8 Hz, 1H), 7.73 (s, 1H), 7.08 (s, 2H), 6.91 (s, 1H), 6.44-6.43 (m, 1H), 5.59 (s, 1H), 5.23 (s, 1H), 4.35 (s, 2H), 2.29 (s, 6H); <sup>13</sup>C NMR (100 MHz, CDCl<sub>3</sub>): δ 169.8, 144.0, 140.6, 139.7, 137.8, 129.5, 128.4, 123.7, 116.6, 109.7, 40.2, 21.3; IR (KBr, cm<sup>-1</sup>): ν 3148, 2918, 1737, 1382, 1350, 1199, 1088, 917, 770; HRMS (EI) calcd for C<sub>15</sub>H<sub>16</sub>N<sub>2</sub>O 240.1263, found 240.1263.

3-(Naphthalen-1-yl)-1-(1*H*-pyrazol-1-yl)but-3-en-1-one (**1l**). Colorless liquid, 64% yield (0.67 g); <sup>1</sup>H NMR (400 MHz, CDCl<sub>3</sub>): δ 8.19 (d, *J* = 2.4 Hz, 1H), 8.16 (d, *J* = 8.0 Hz, 1H), 7.85-7.83 (m, 1H), 7.78-7.76 (m, 1H), 7.67(s, 1H), 7.52-7.40 (m, 4H), 6.39 (d, *J* = 1.2 Hz, 1H), 5.61 (s, 1H), 5.40 (s, 1H), 4.39 (s, 2H); <sup>13</sup>C NMR (100 MHz, CDCl<sub>3</sub>): δ 169.4, 144.0, 140.5, 139.6, 133.7, 131.0, 128.3, 128.2, 127.8, 126.1, 125.7, 125.5, 125.2, 120.5, 109.7, 42.9, 29.7; IR (KBr, cm<sup>-1</sup>): ν 3052, 2919, 1708, 1384, 1201, 919, 802, 776; HRMS (EI) calcd for C<sub>17</sub>H<sub>14</sub>N<sub>2</sub>O 262.1106, found 262.1110.

3-(Naphthalen-2-yl)-1-(1*H*-pyrazol-1-yl)but-3-en-1-one (**1m**). Colorless liquid, 74% yield (0.78 g); <sup>1</sup>H NMR (400 MHz, CDCl<sub>3</sub>): δ 8.23 (d, *J* = 2.8 Hz, 1H), 7.87 (s, 1H), 7.80-7.76 (m, 4H), 7.67-7.65 (m, 1H), 7.44-7.42 (m, 2H), 6.44-6.43 (m, 1H), 5.78 (s, 1H), 5.40 (s, 1H), 4.50 (s, 2H); <sup>13</sup>C NMR (100 MHz, CDCl<sub>3</sub>): δ 169.7, 144.1, 140.3, 136.9, 133.2, 132.9, 128.5, 128.3, 128.1, 127.5, 126.2, 126.0, 124.7, 124.1, 117.6, 109.9, 40.2; IR (KBr, cm<sup>-1</sup>): ν 3055, 2917, 1731, 1623, 1382, 1350, 1199, 1089, 914, 861; HRMS (EI) calcd for C<sub>17</sub>H<sub>14</sub>N<sub>2</sub>O 262.1106, found 262.1107.

### 3. References

- 1 (a) B. Vakulya, S. Varga, A. Csámpai and T. Soós, *Org. Lett.*, 2005, **7**, 1967; (b) T.-Y. Liu, J. Long, B.-J. Li, L. Jiang, R. Li, Y. Wu, L.-S. Ding and Y.-C. Chen, *Org. Biomol. Chem.*, 2006, **4**, 2097.
- 2 W. Li, W. Wu, F. Yu, H. Huang, X. Liang and J. Ye, *Org. Biomol. Chem.*, 2011, **9**, 2505.
- 3 W. Yang and D.-M. Du, *Org. Lett.*, 2010, **12**, 5450.
- 4 (a) T. Okino, Y. Hoashi, T. Furukawa, X. Xu and Y. Takemoto, *J. Am. Chem. Soc.*, 2005, **127**, 119; (b) S.-Z. Nie, Z.-P. Hu, Y.-N. Xuan, J.-J. Wang, X.-M. Li and M. Yan, *Tetrahedron: Asymmetry*, 2010, **21**, 2055.

5 W. R. Carroll, P. Pellechia and K. D. Shimizu, *Org. Lett.*, 2008, **10**, 3547.

6 (a) Q. Li, J. Li, H. Ren, Z. Gao and D. Liu, *Synth. Commun.*, 2011, **41**, 3325; (b) J. Hu, D. Zhang and F. W. Harris, *J. Org. Chem.*, 2005, **70**, 707.

#### 4. Copies of NMR Spectra of the Products

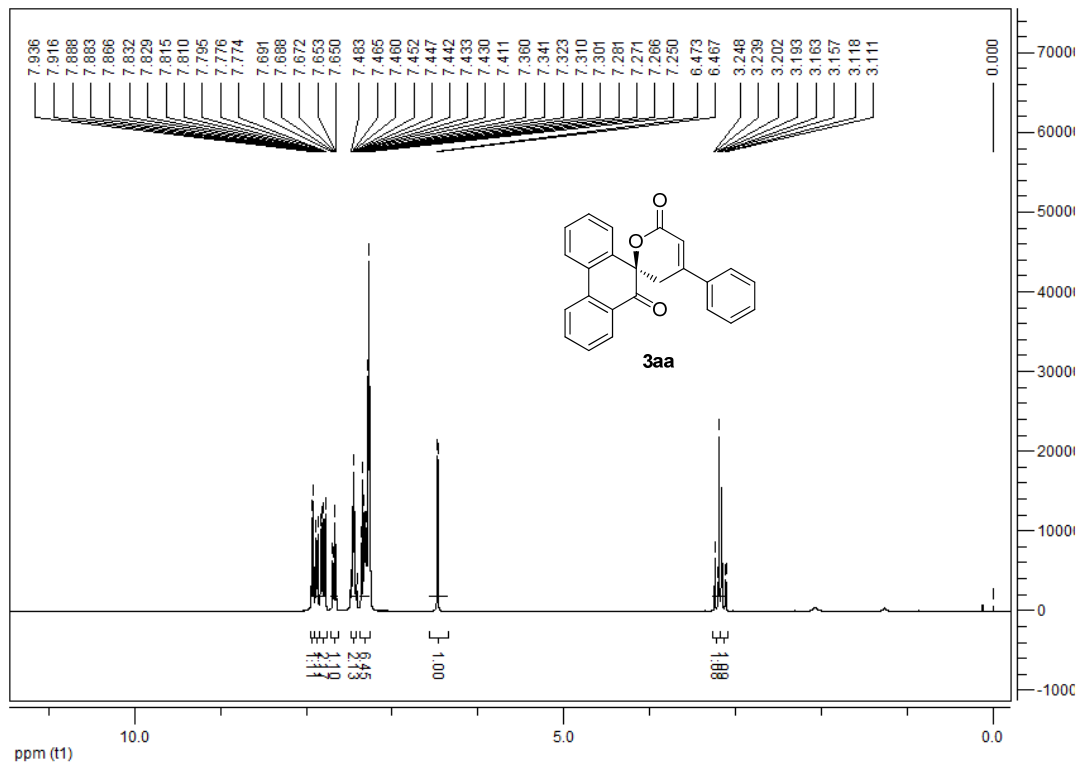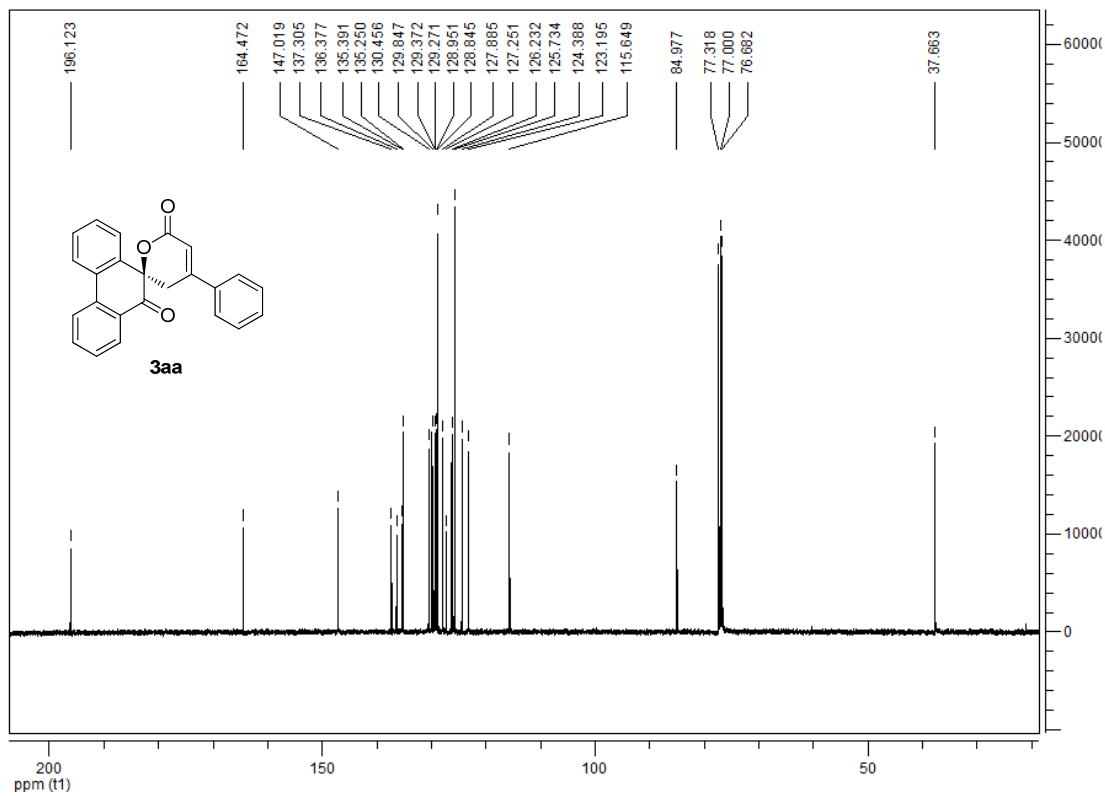

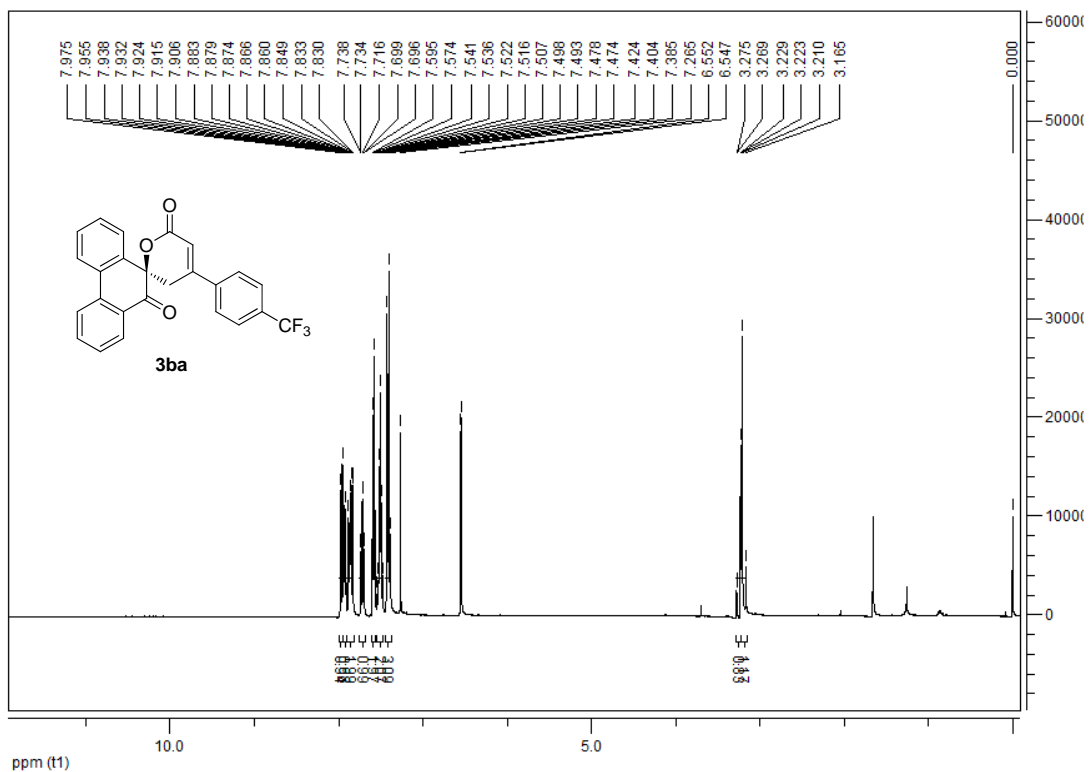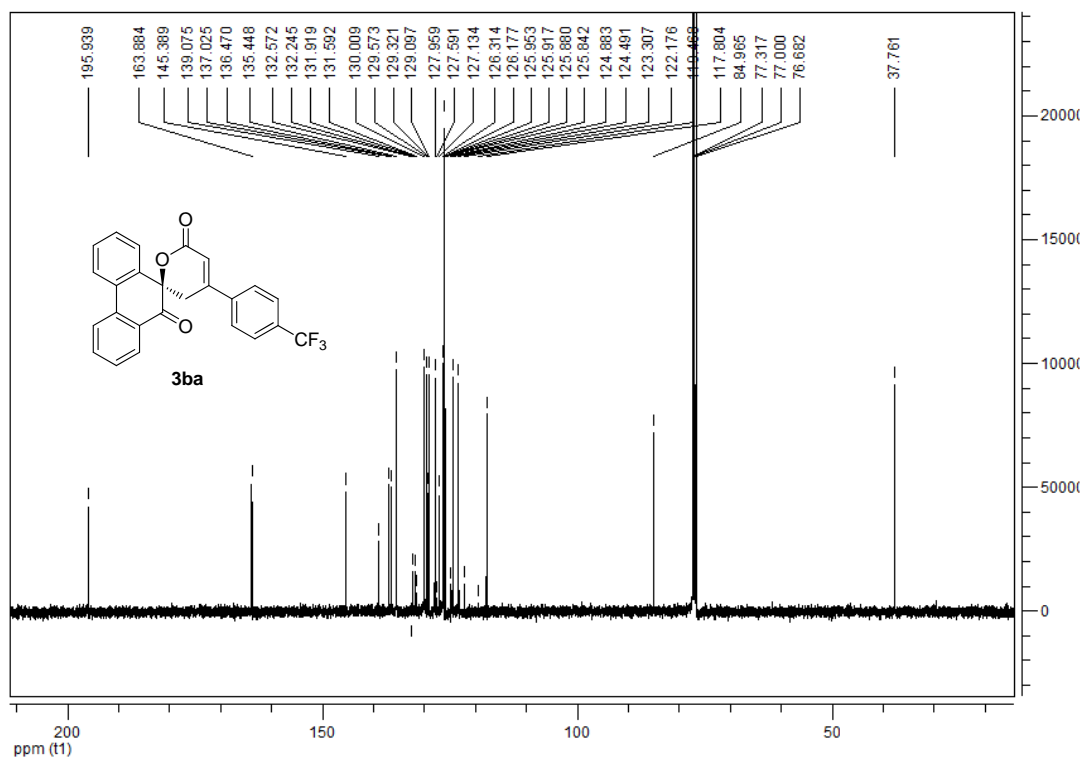

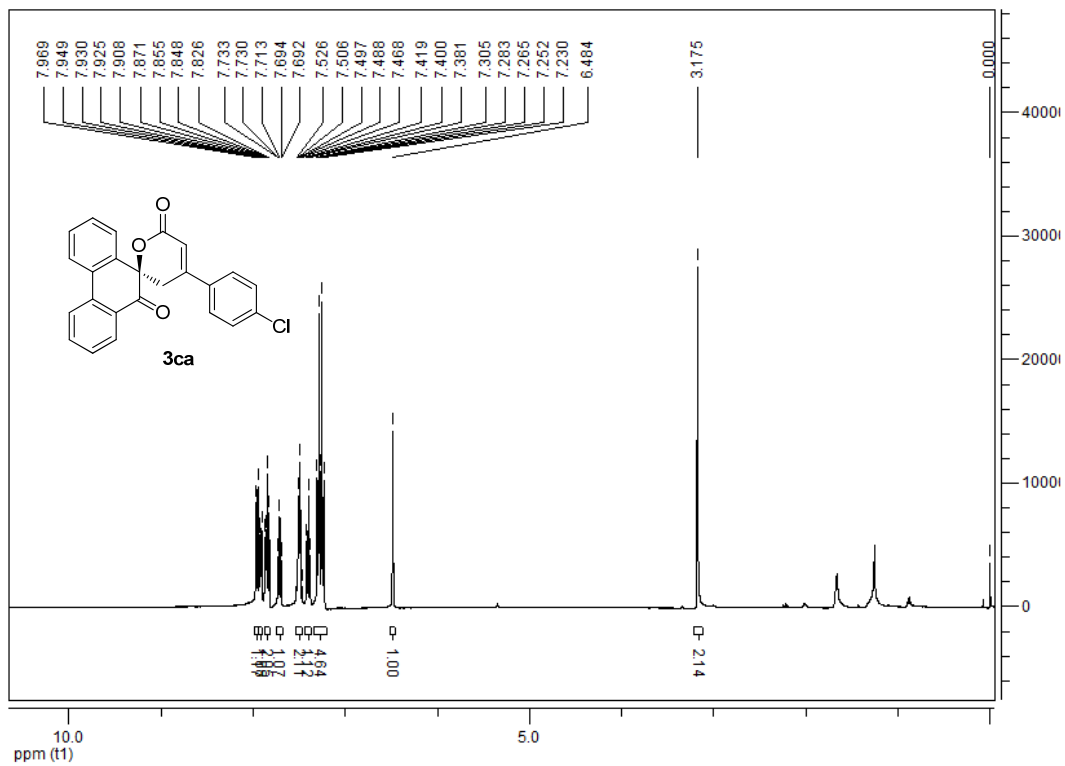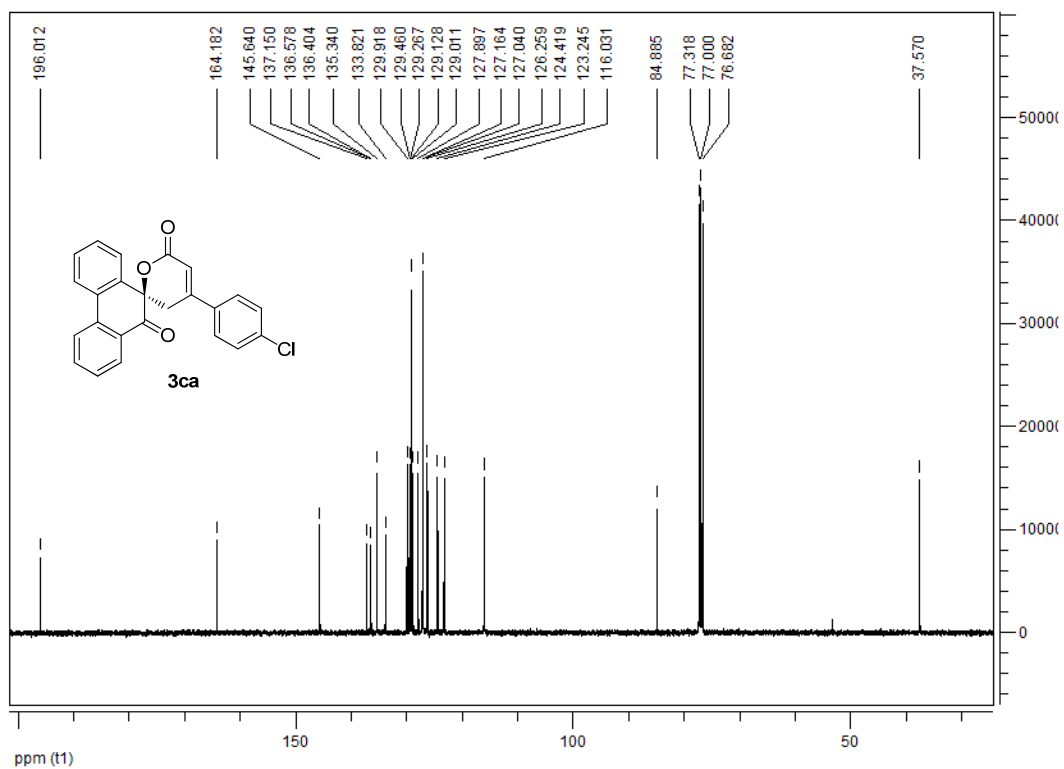

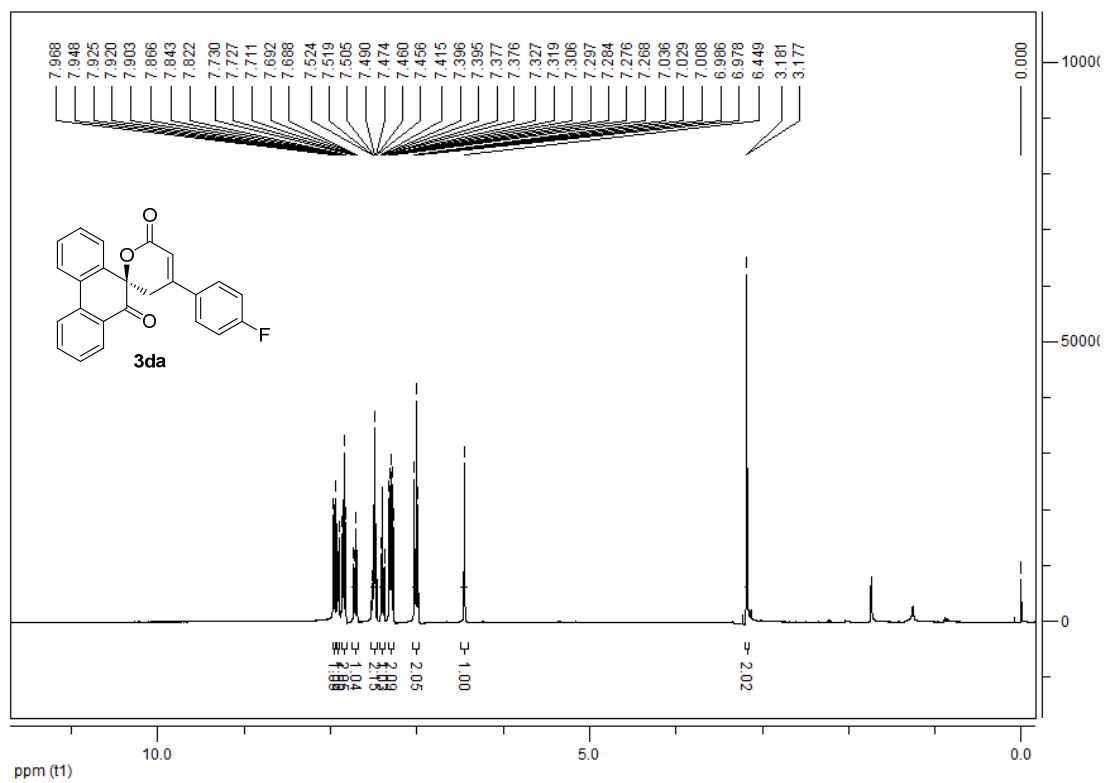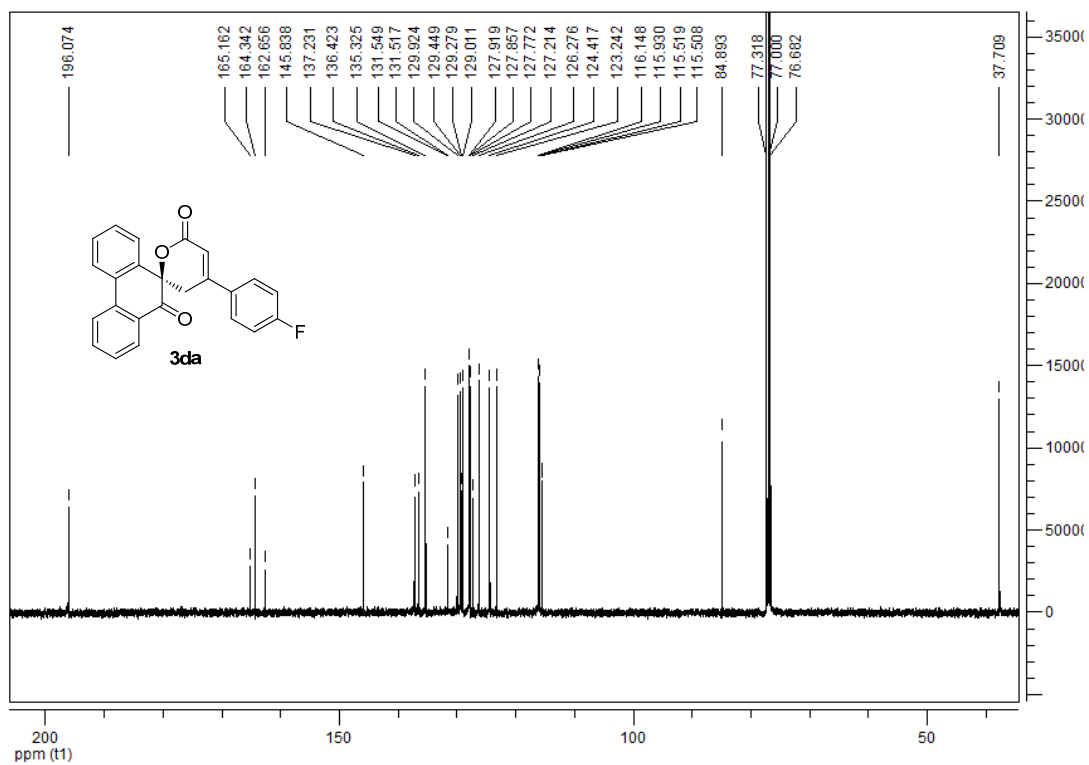



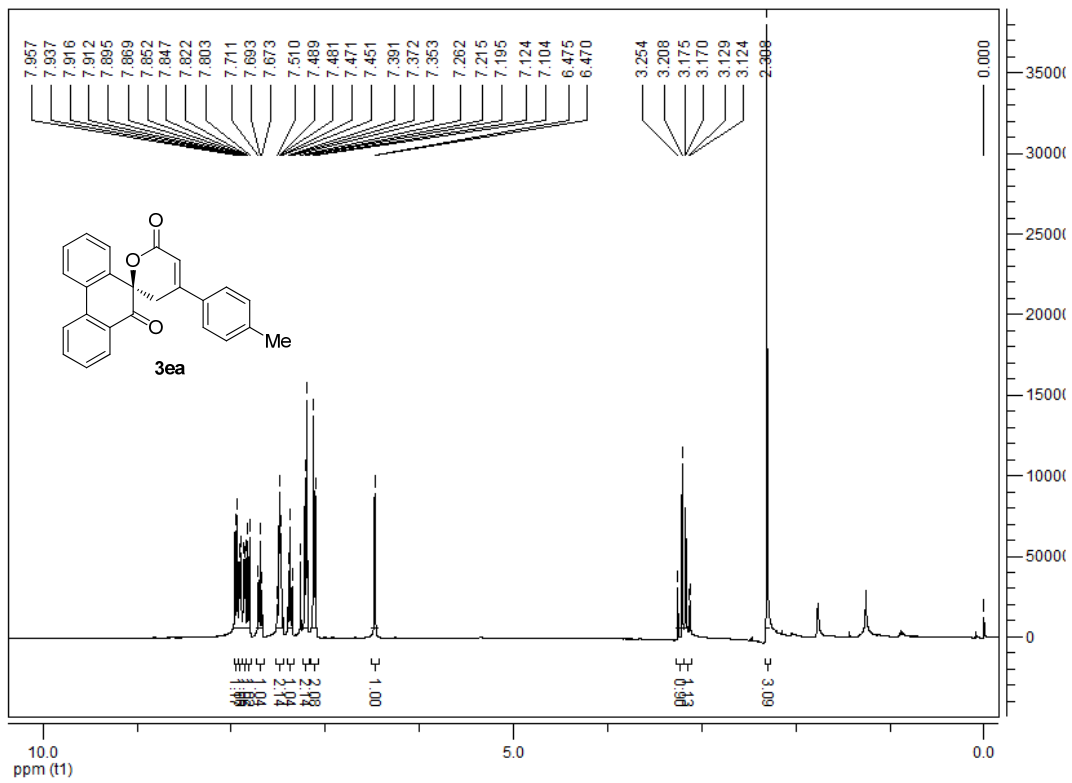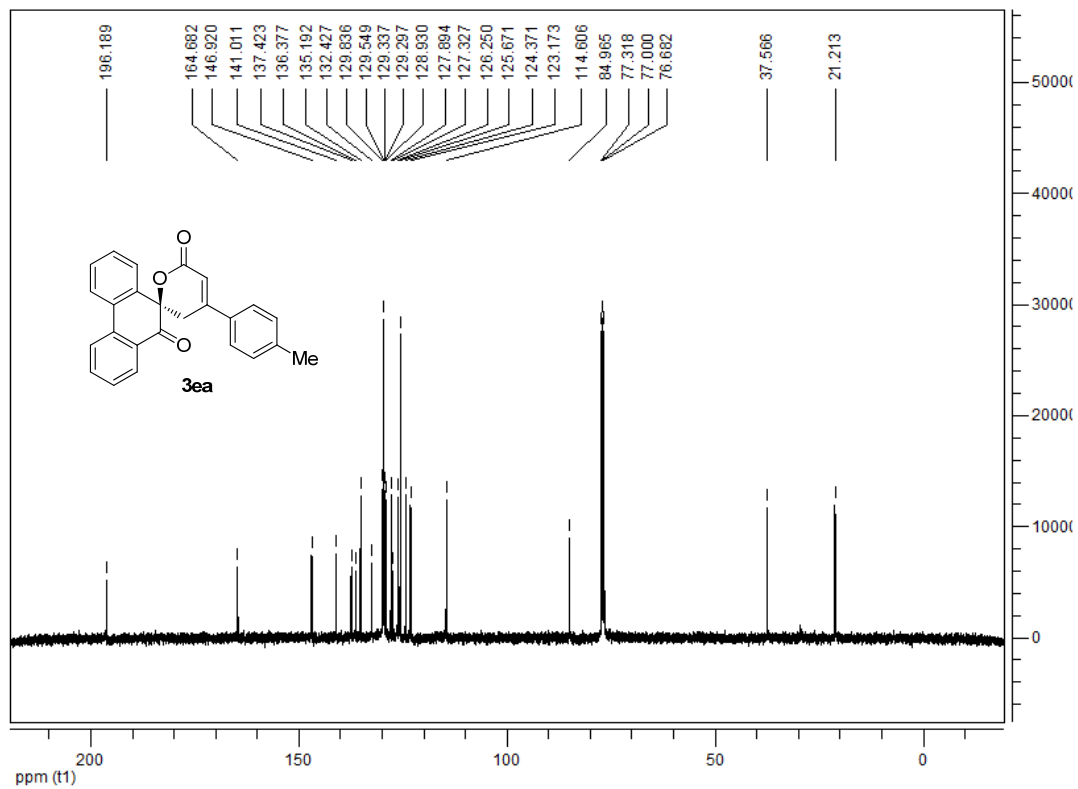

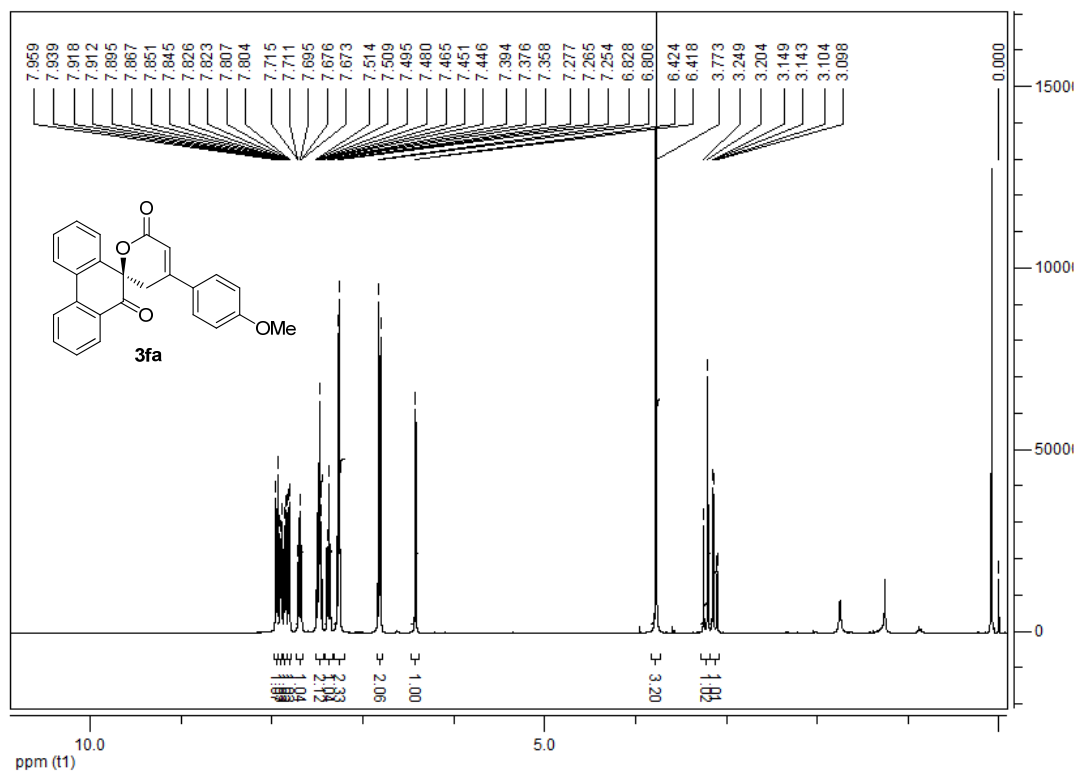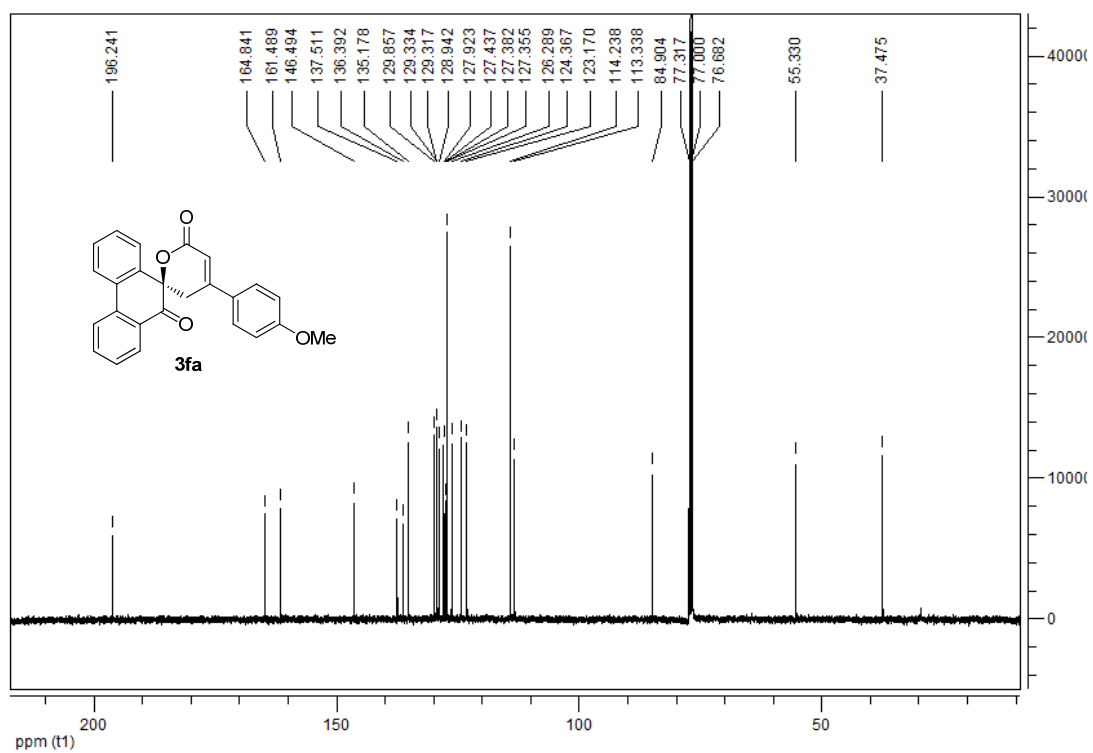

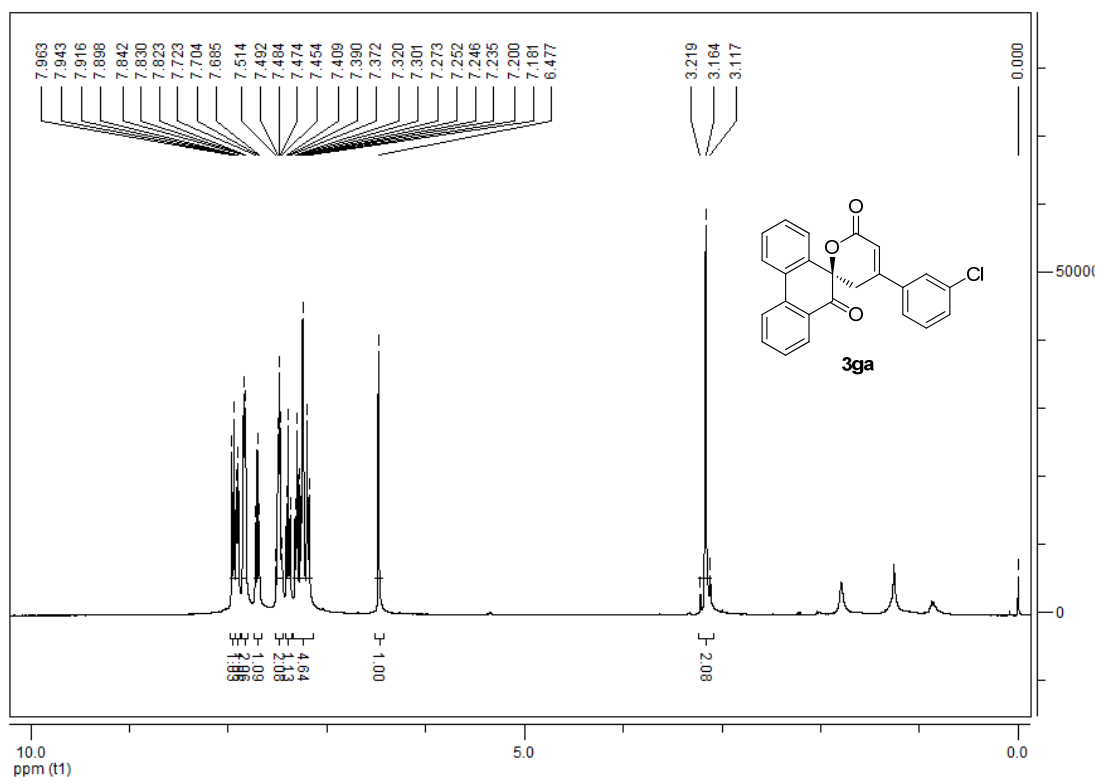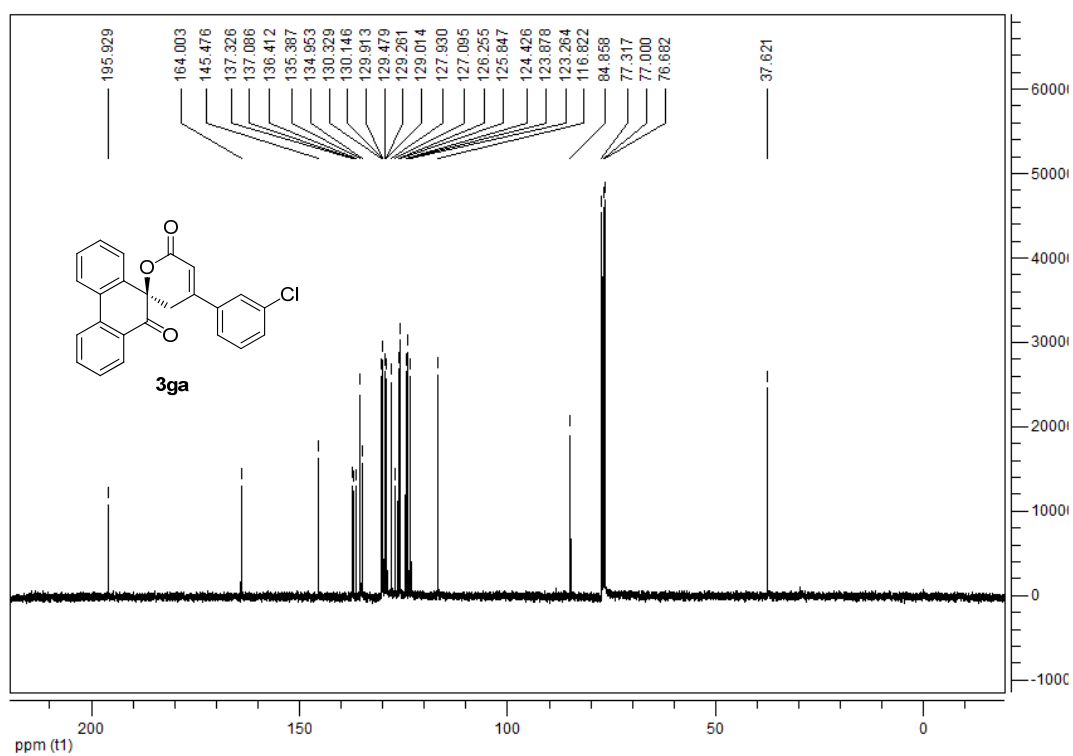

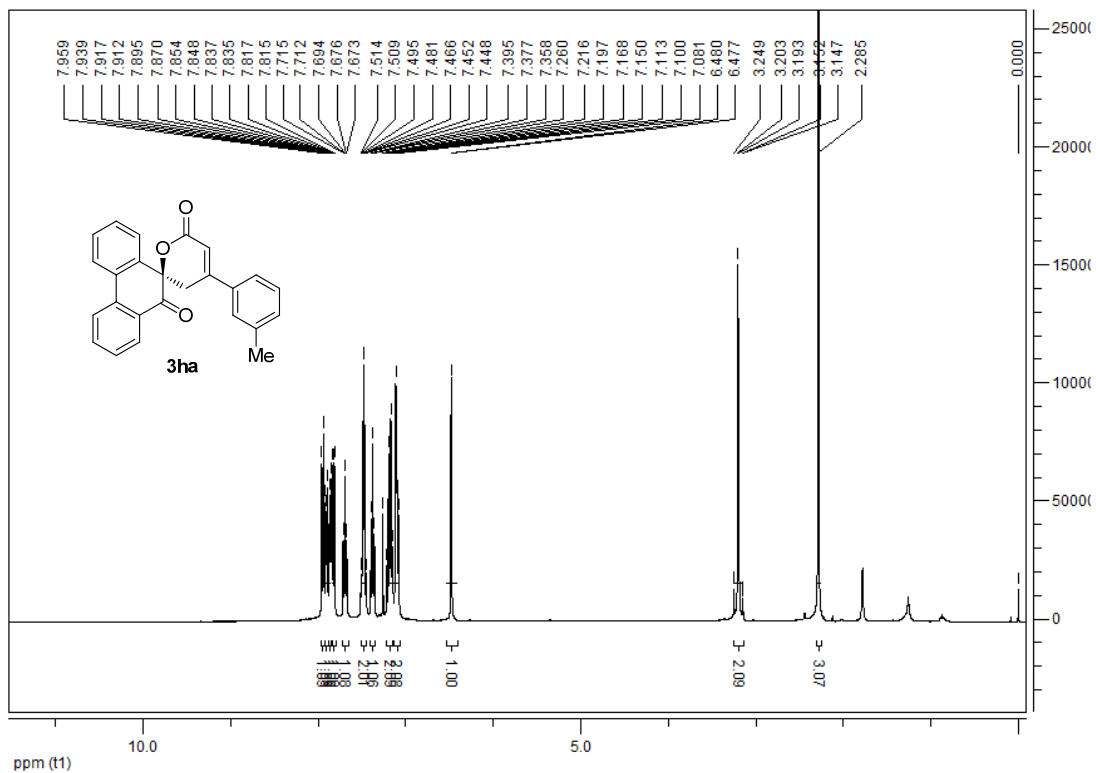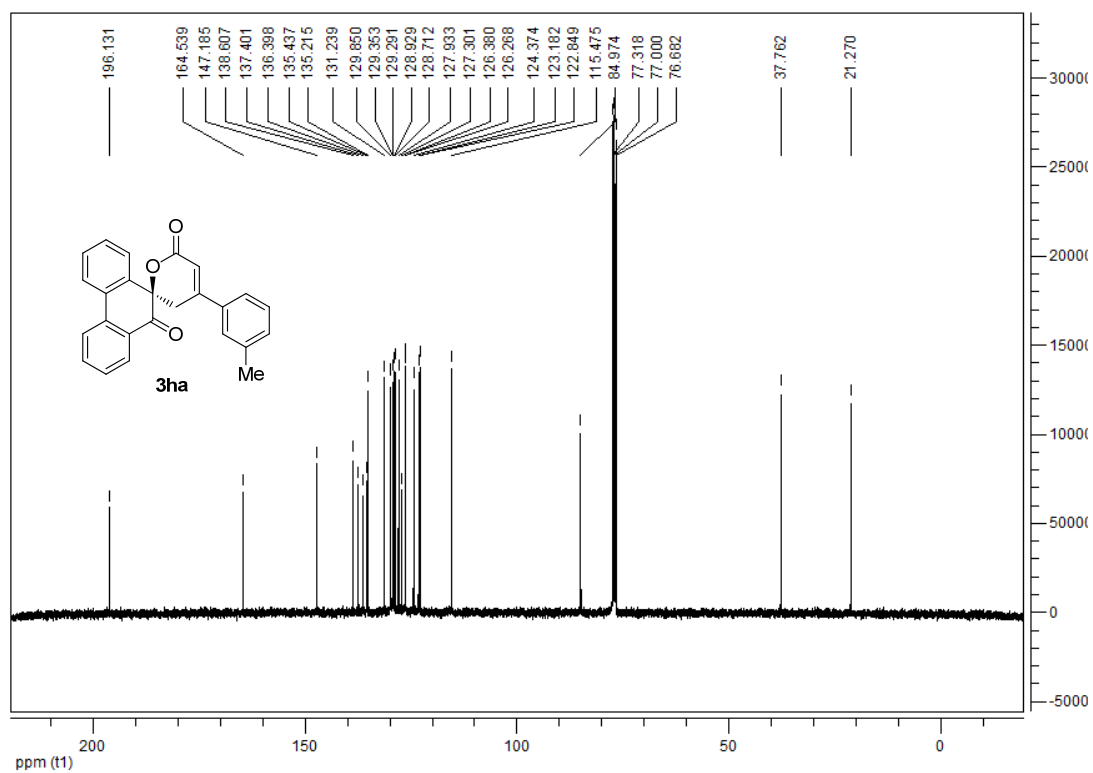

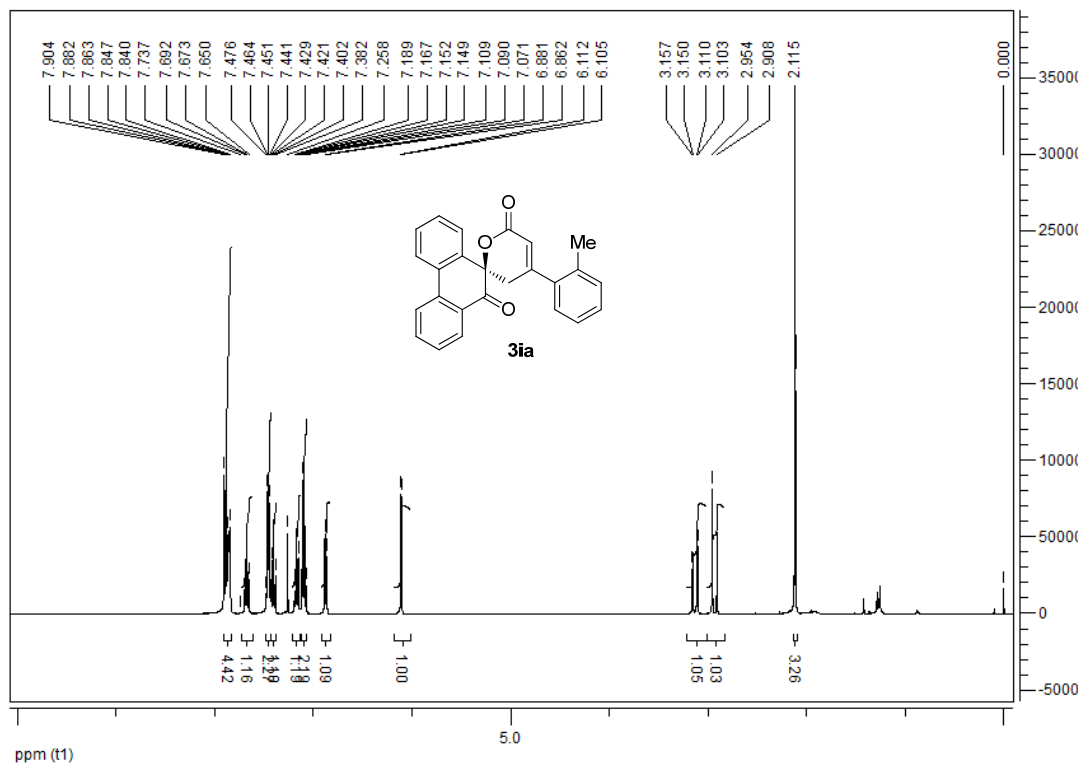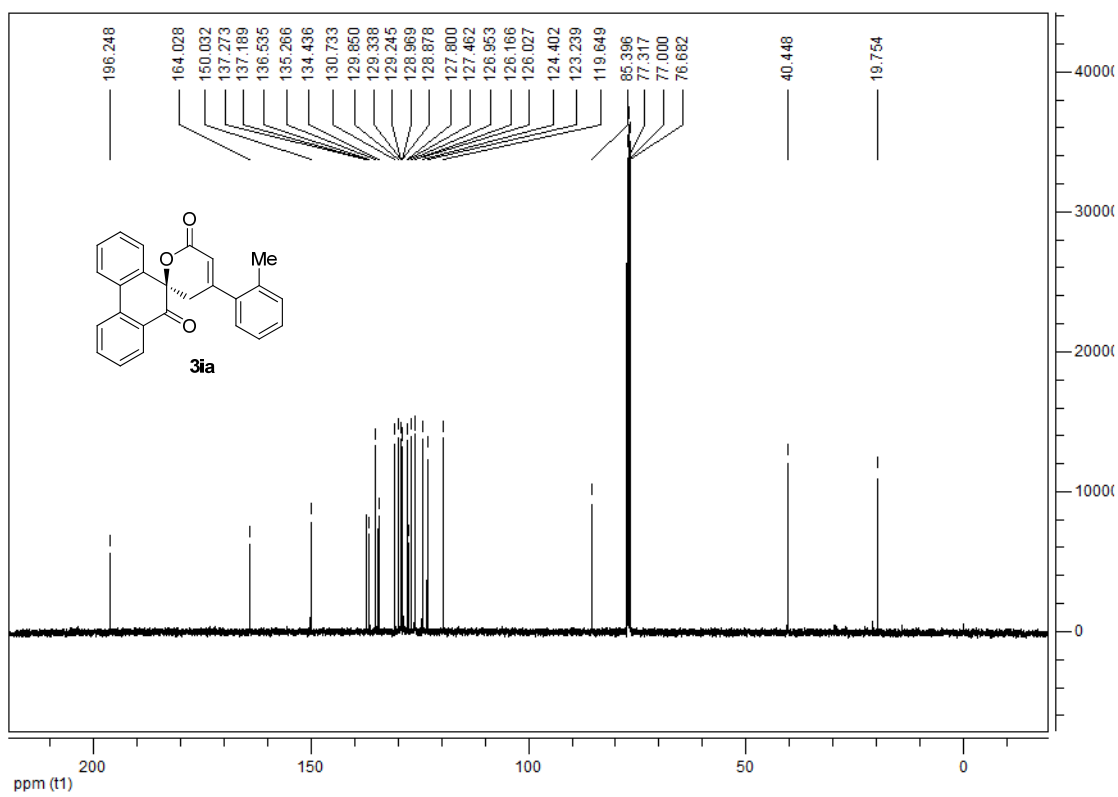

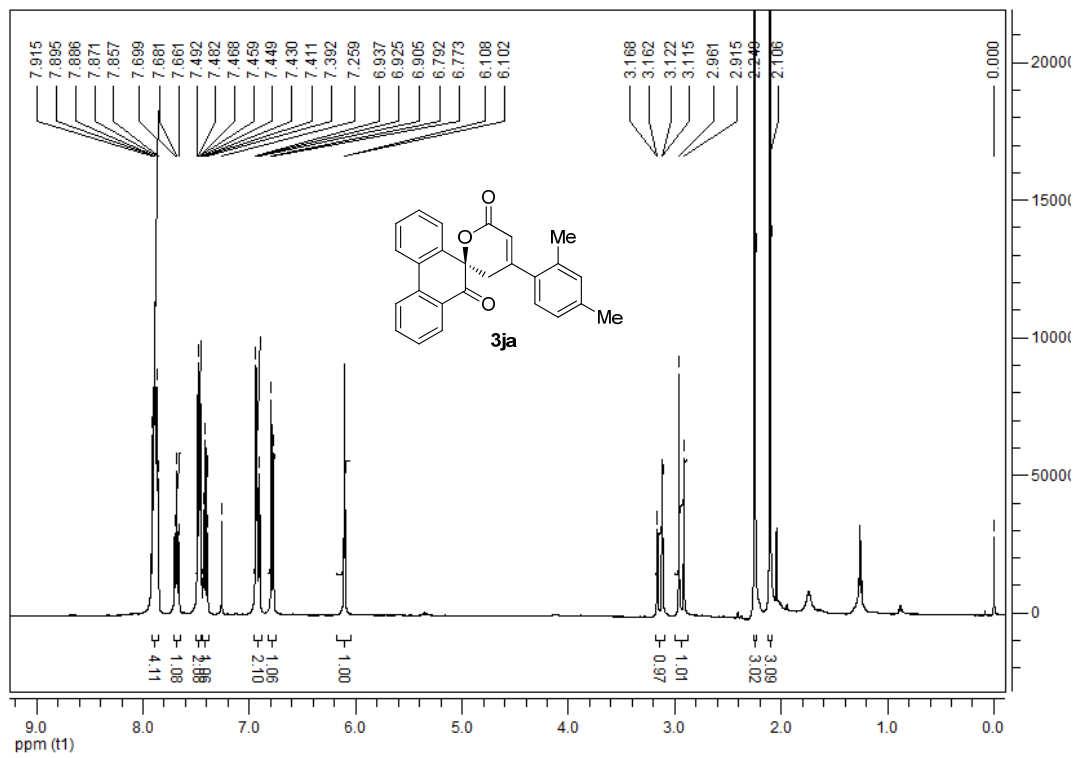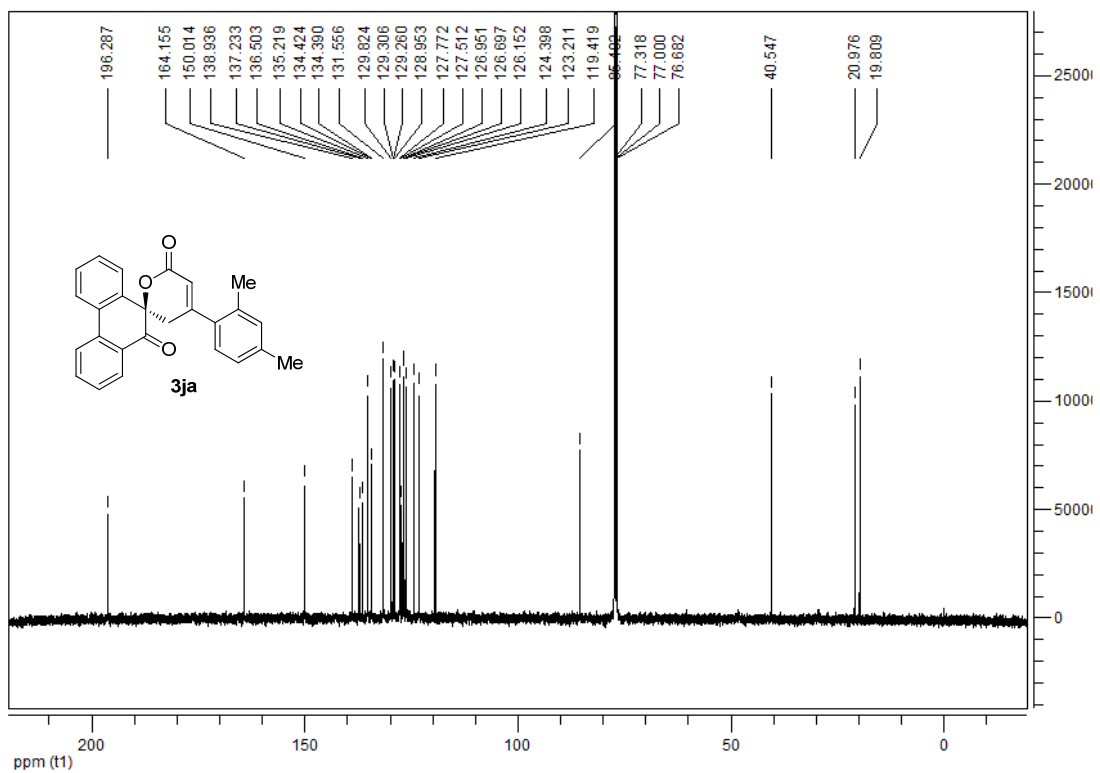

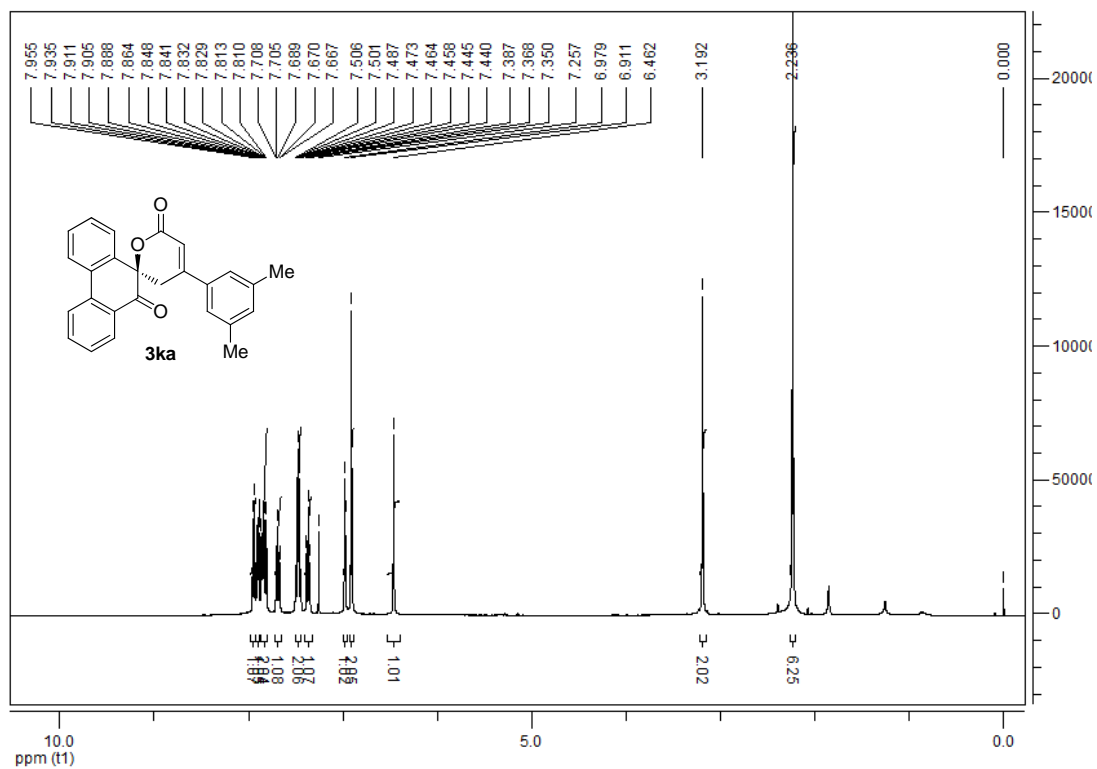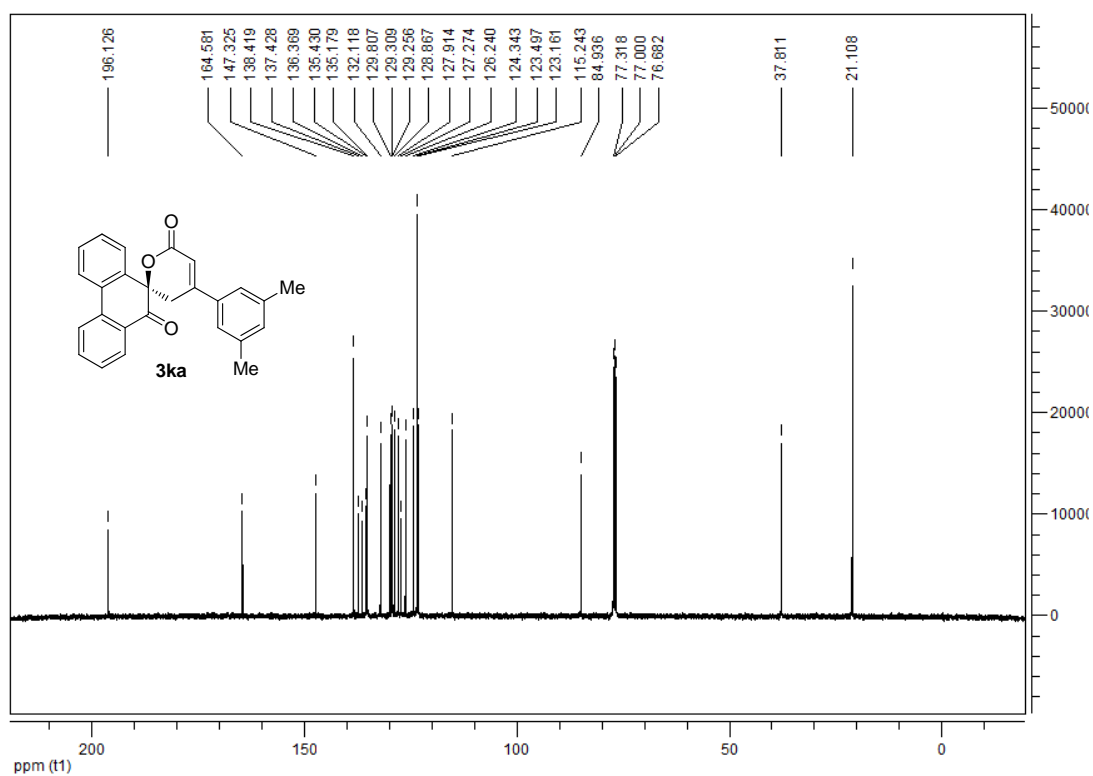

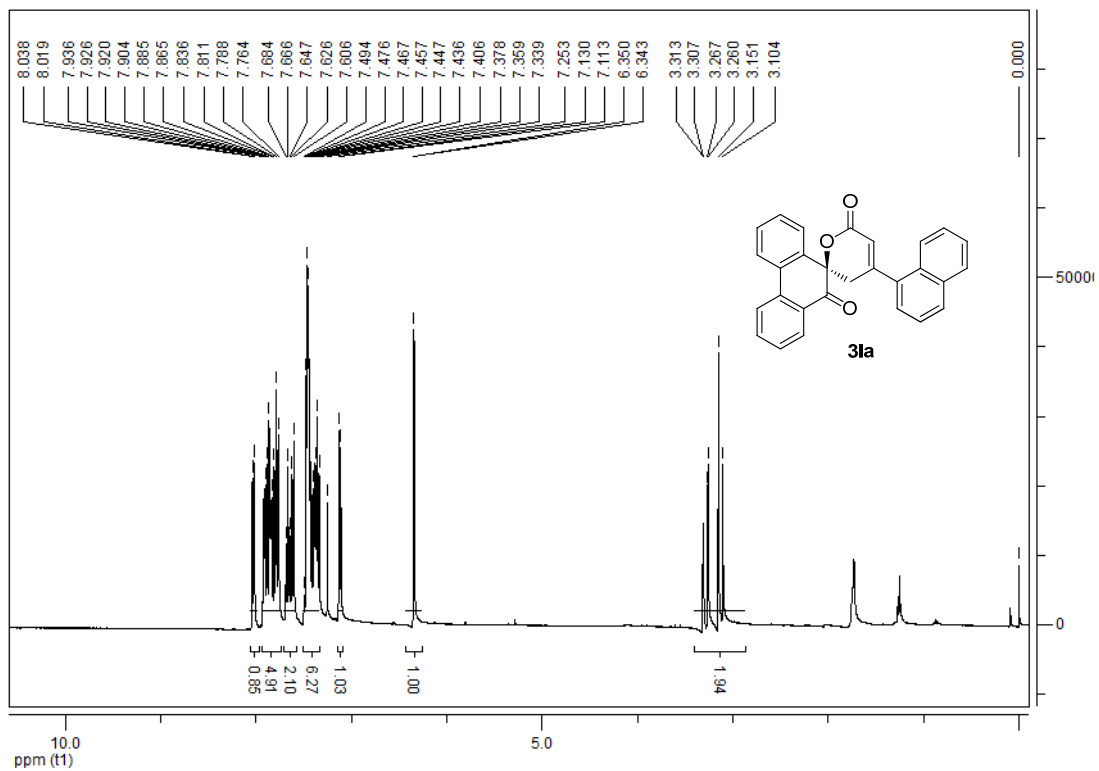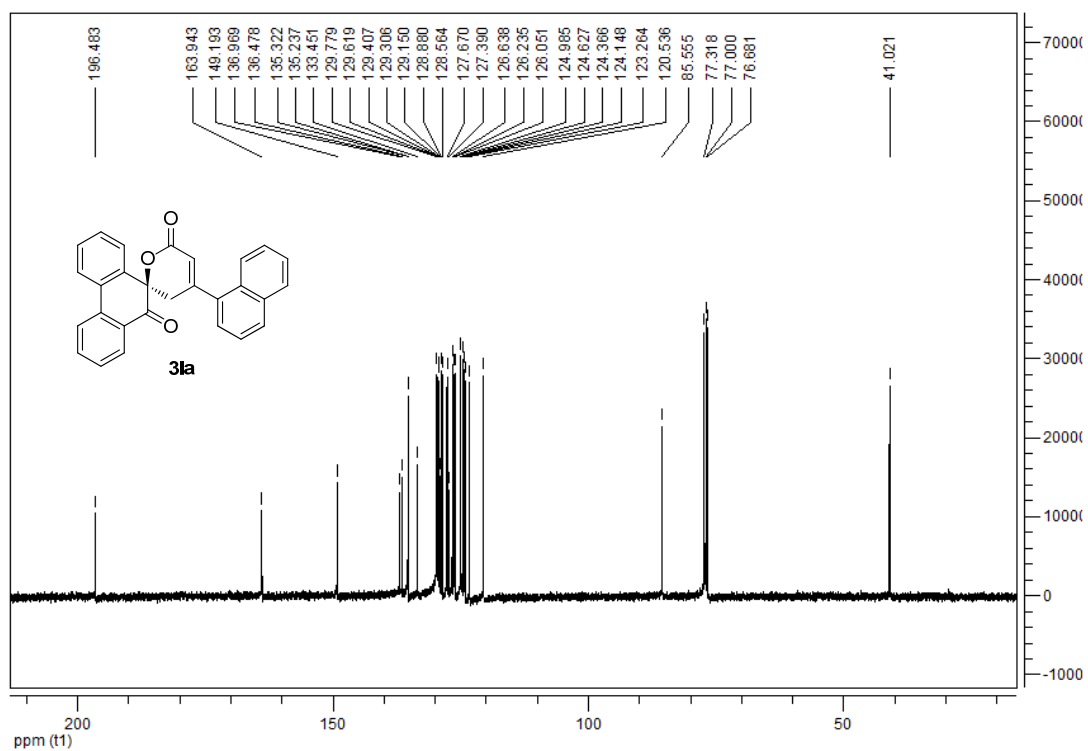



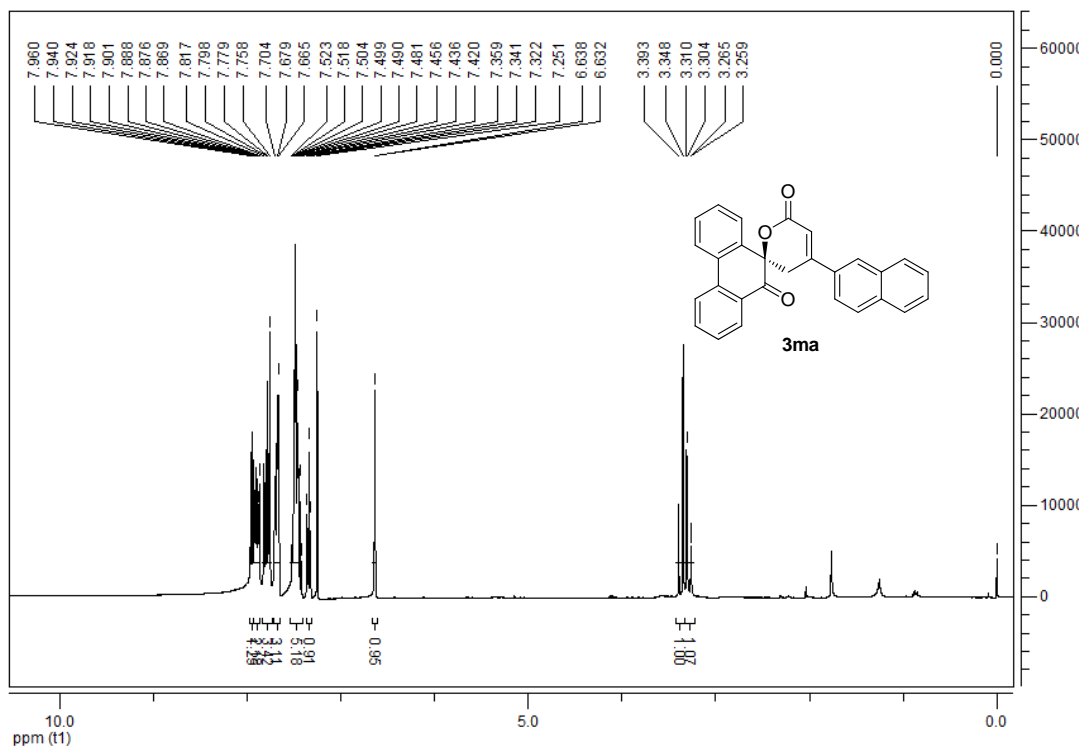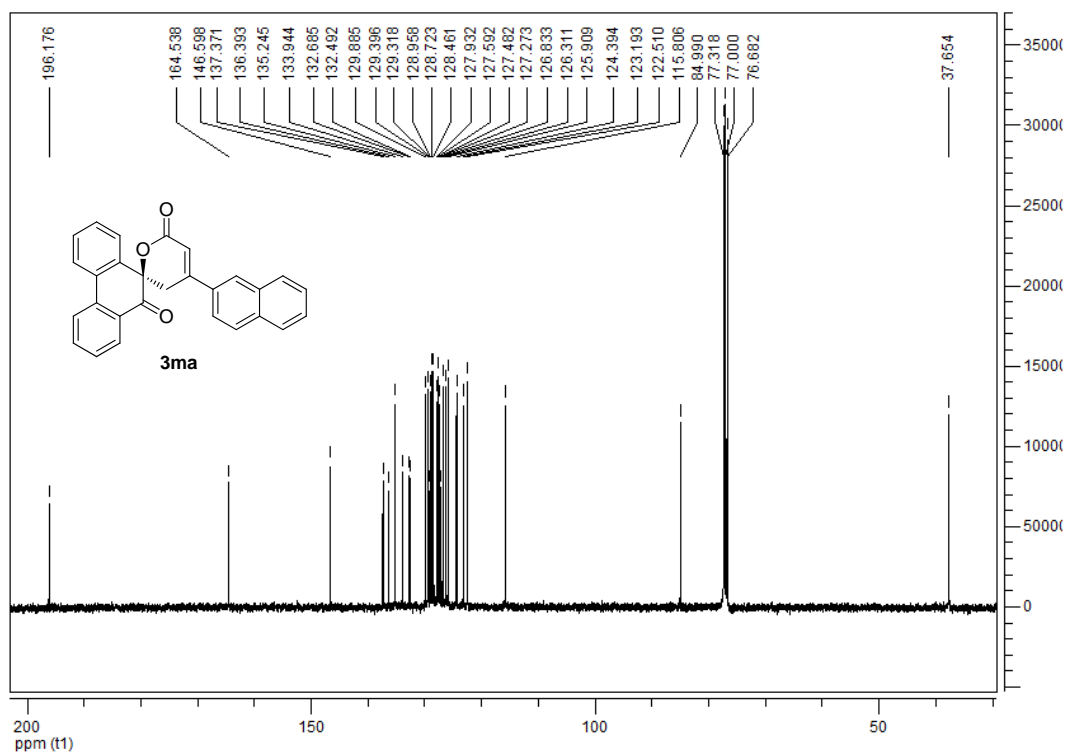

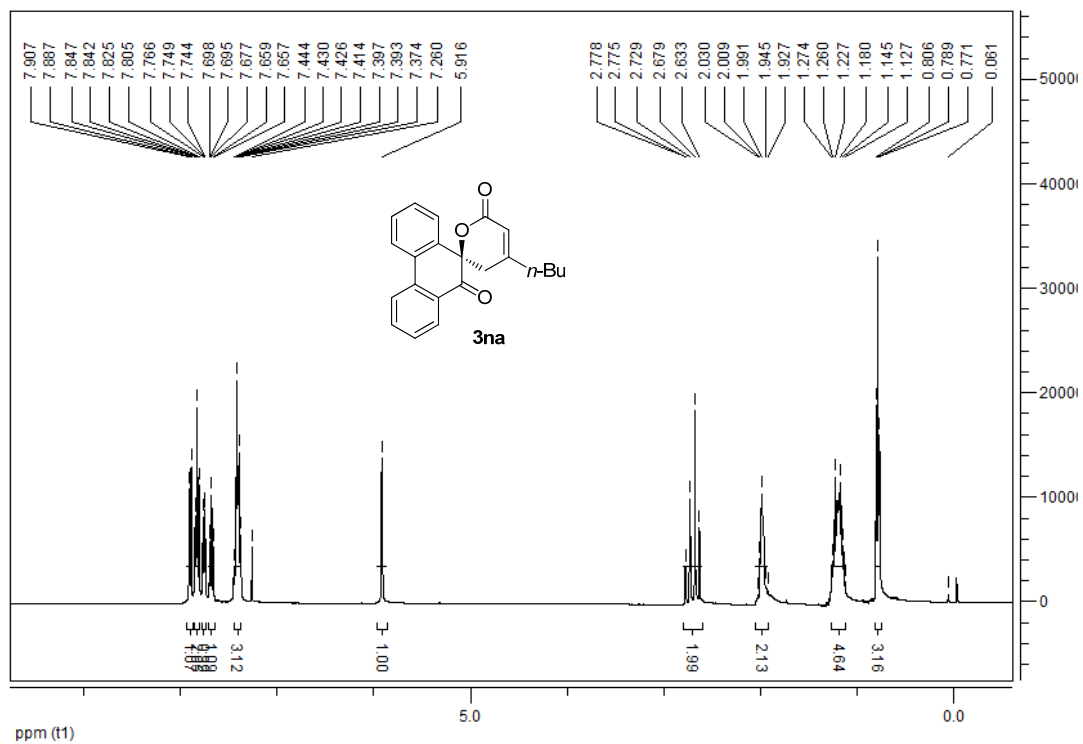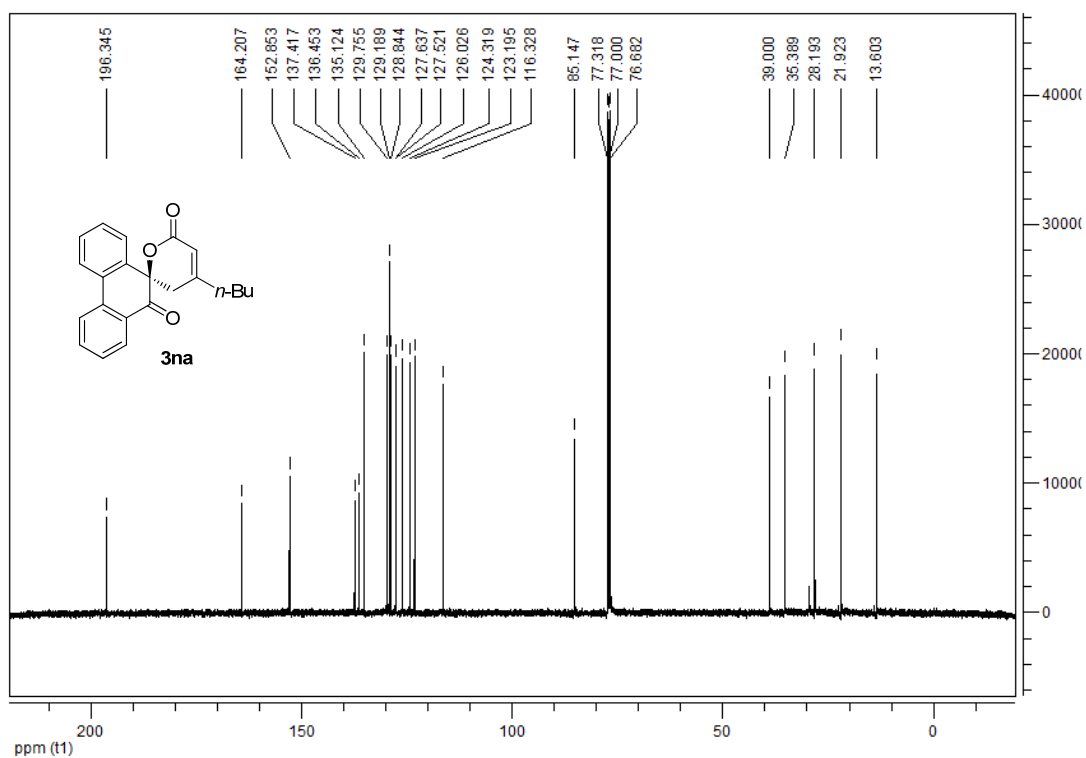

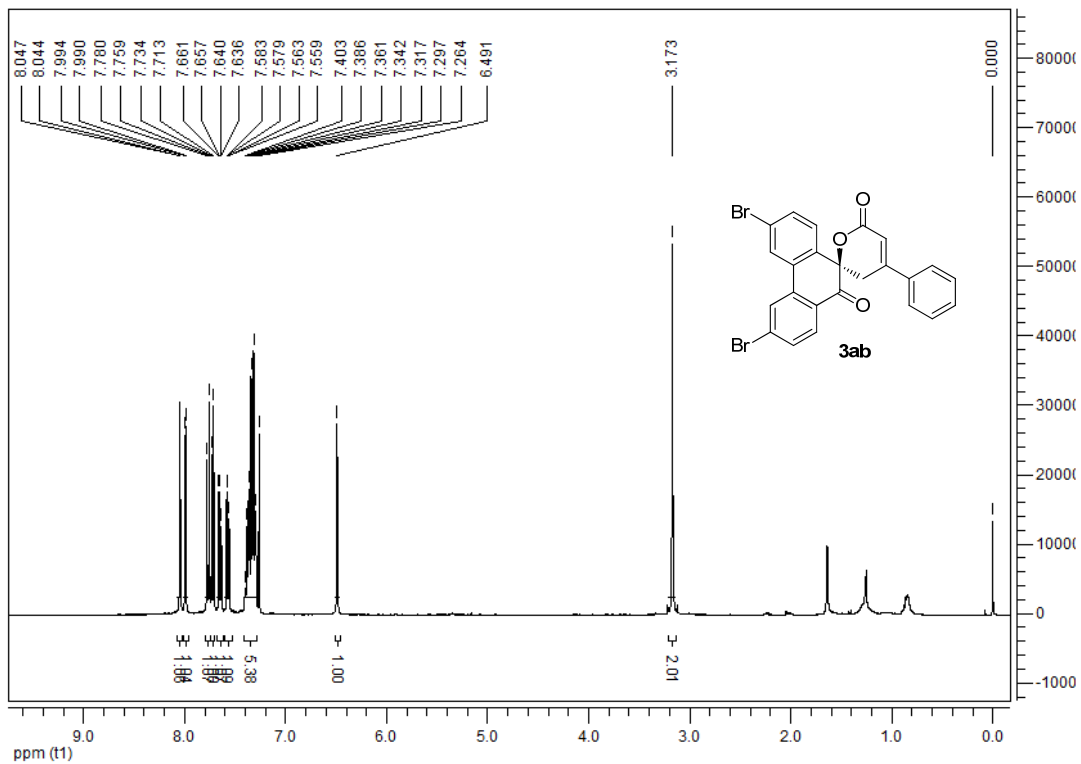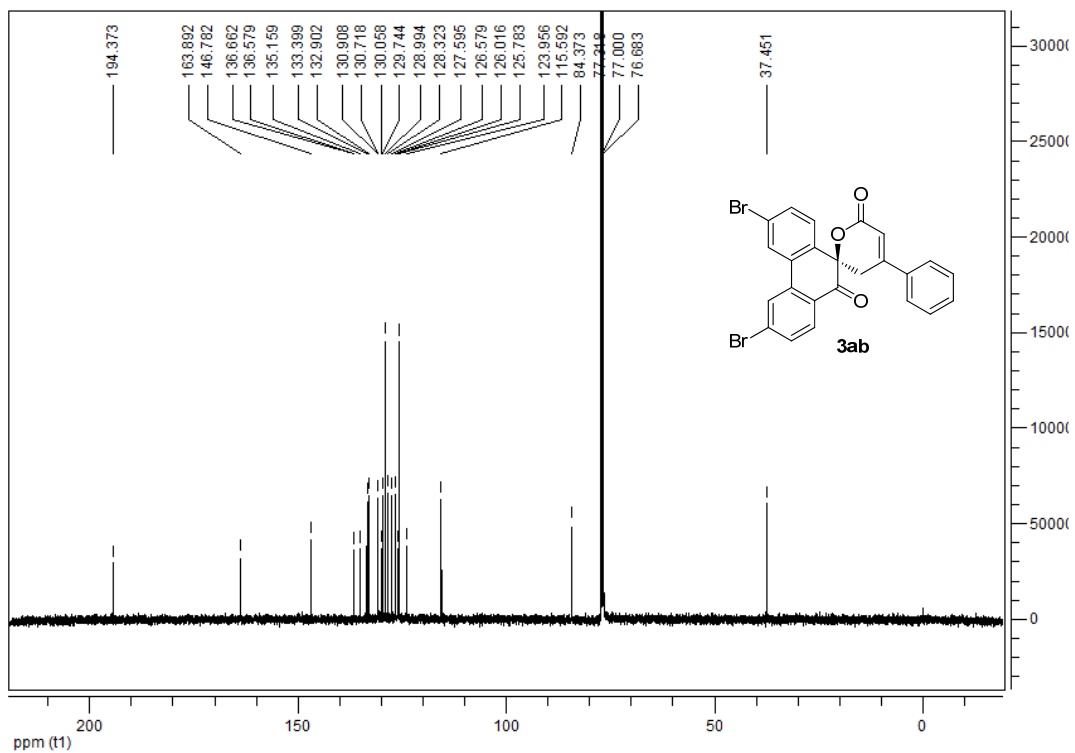

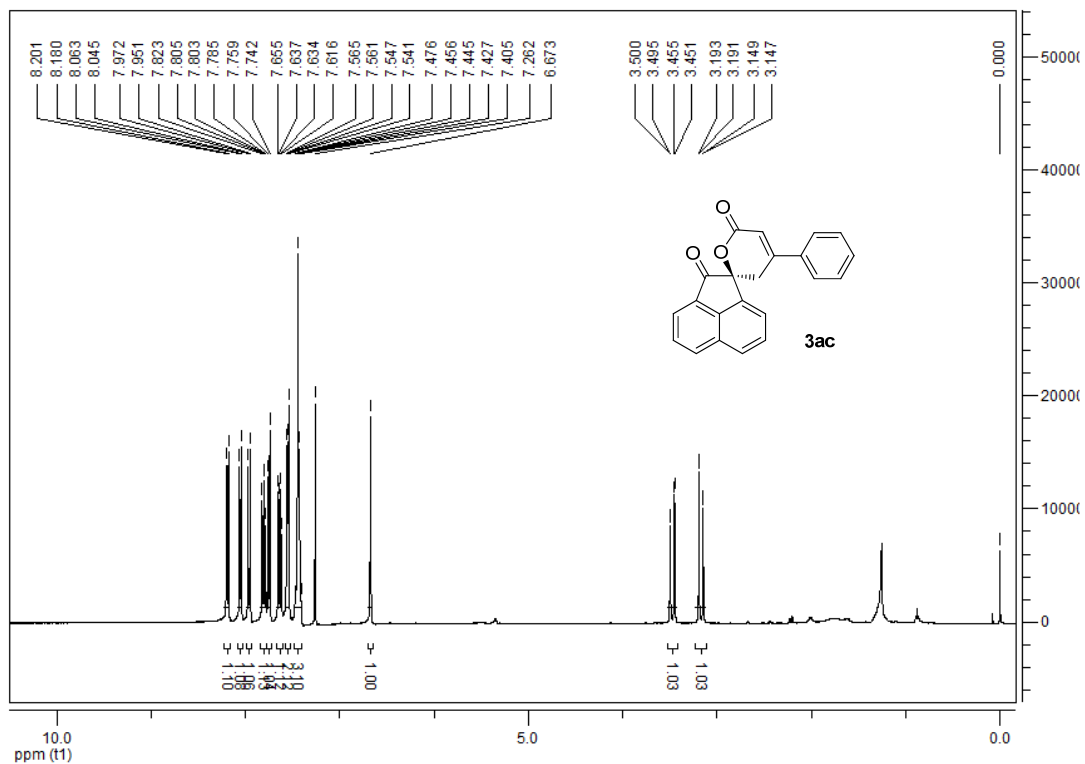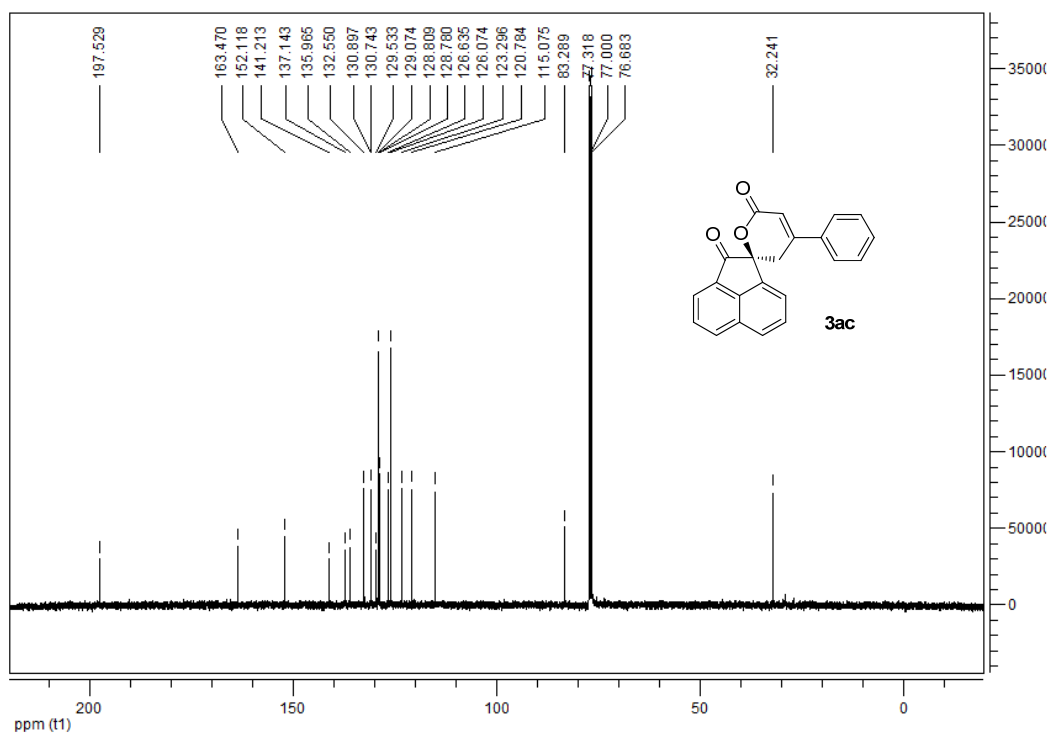

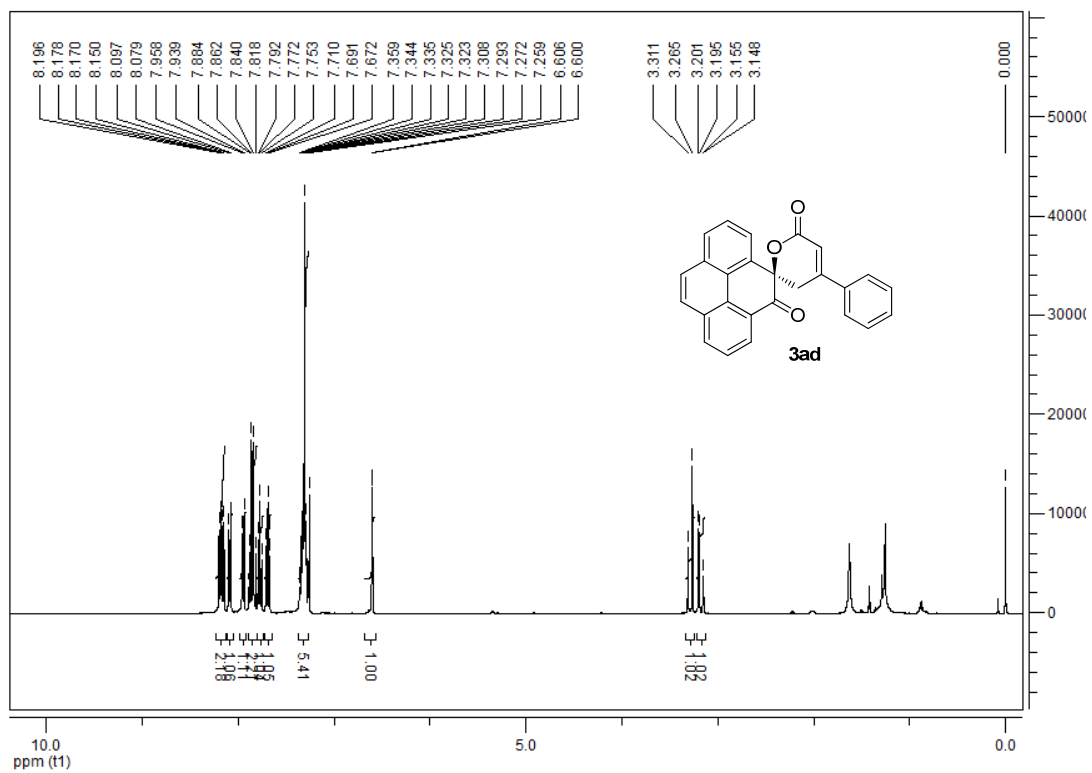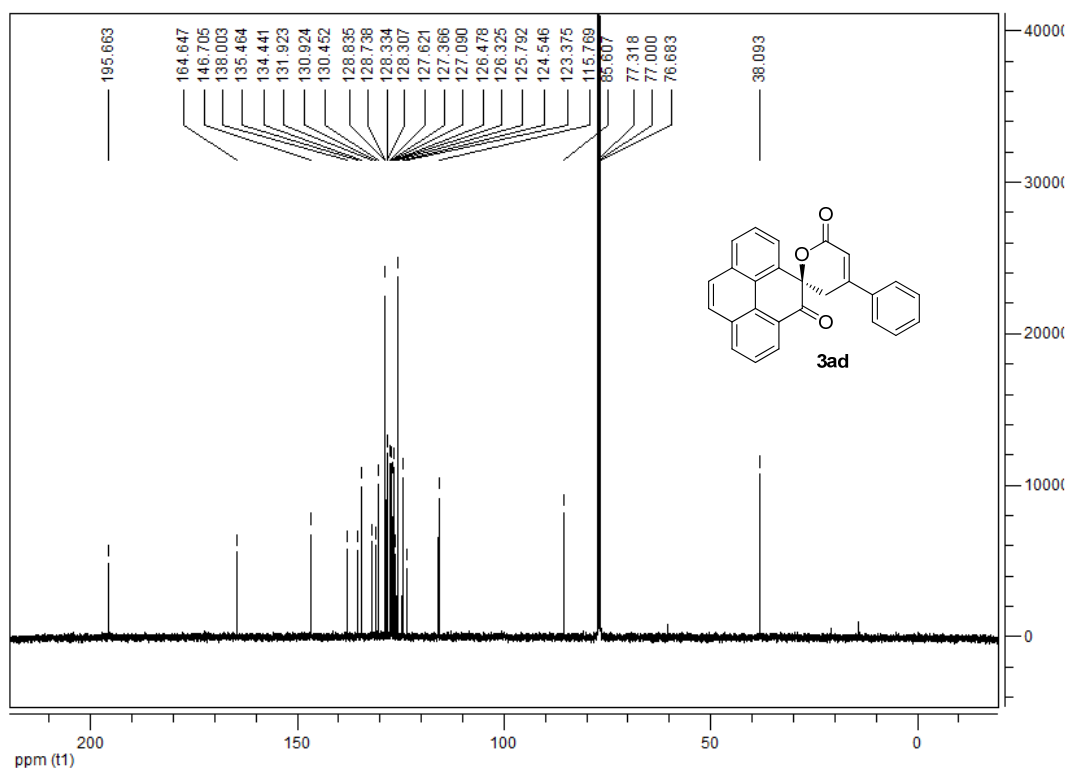

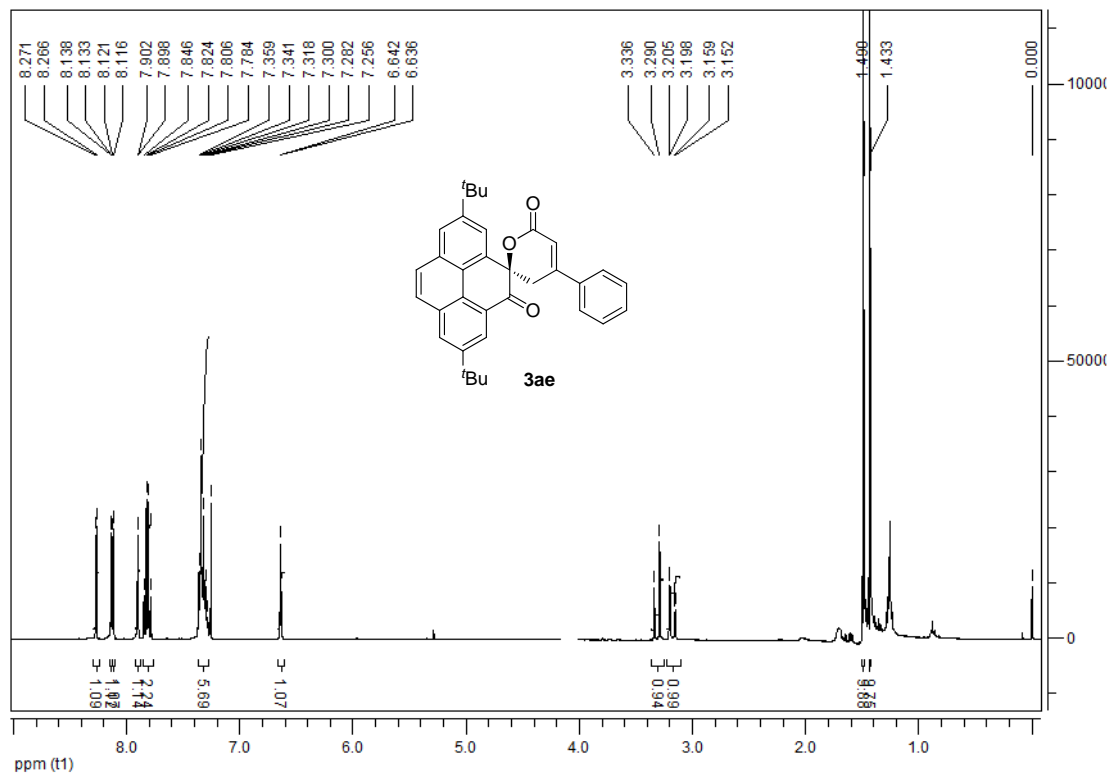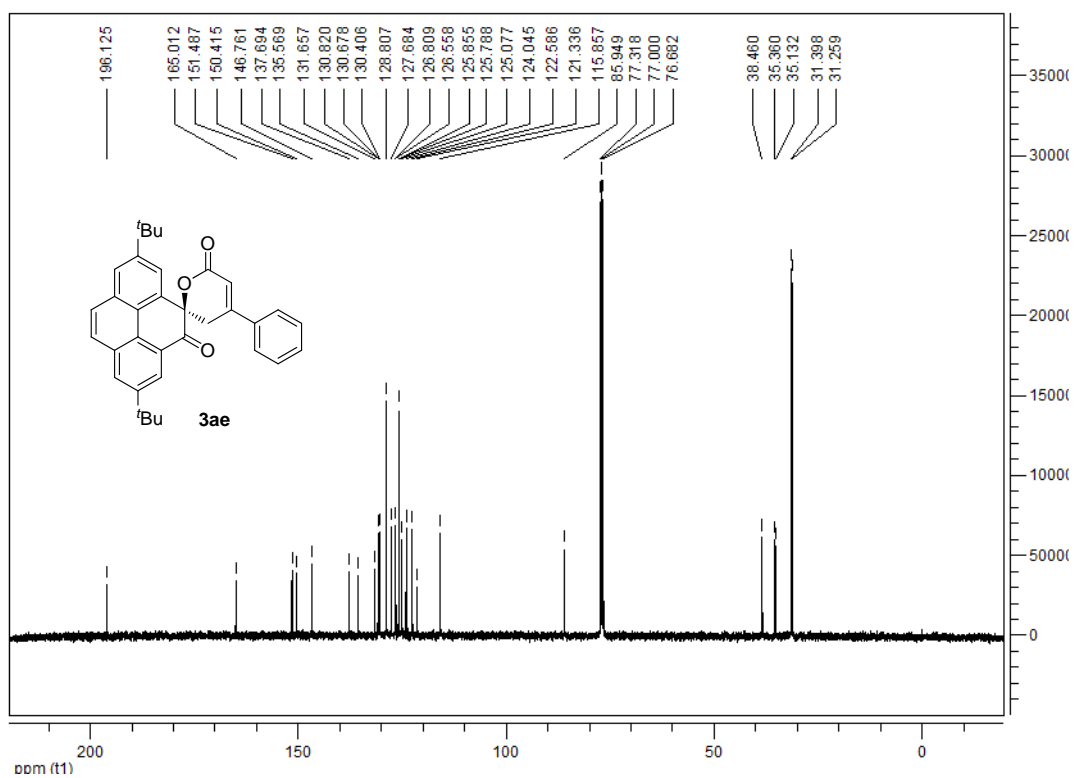

## 5. Copies of NMR Spectra of the Substrates

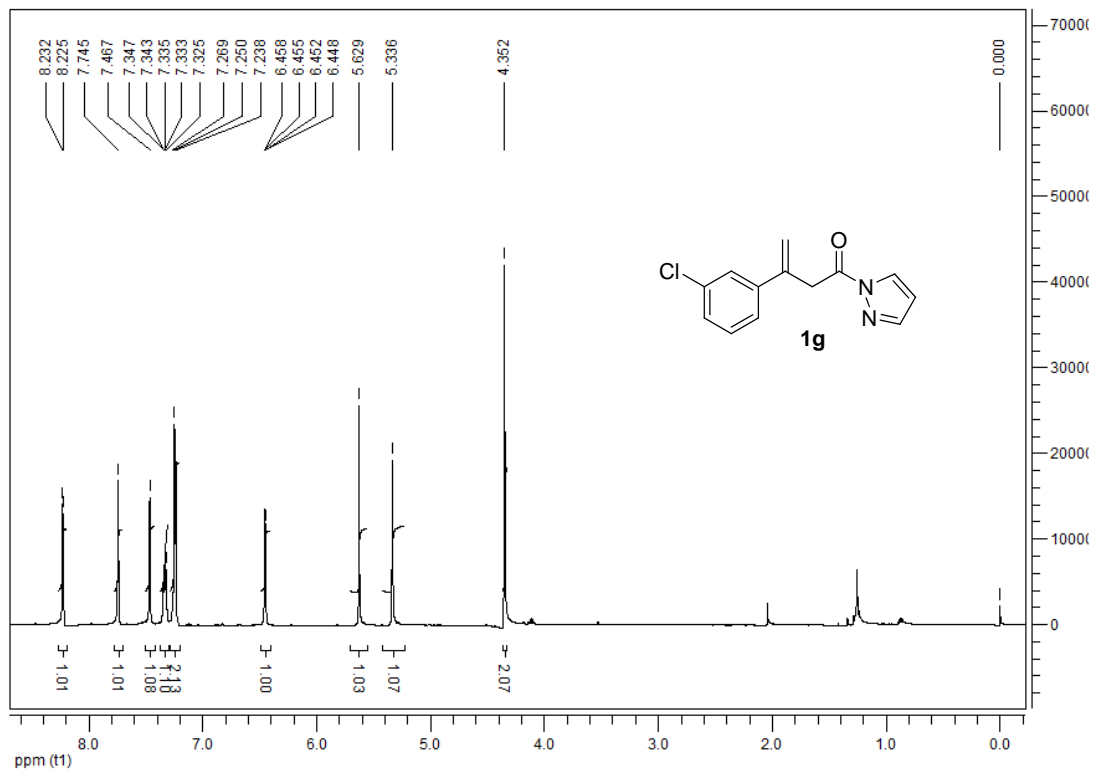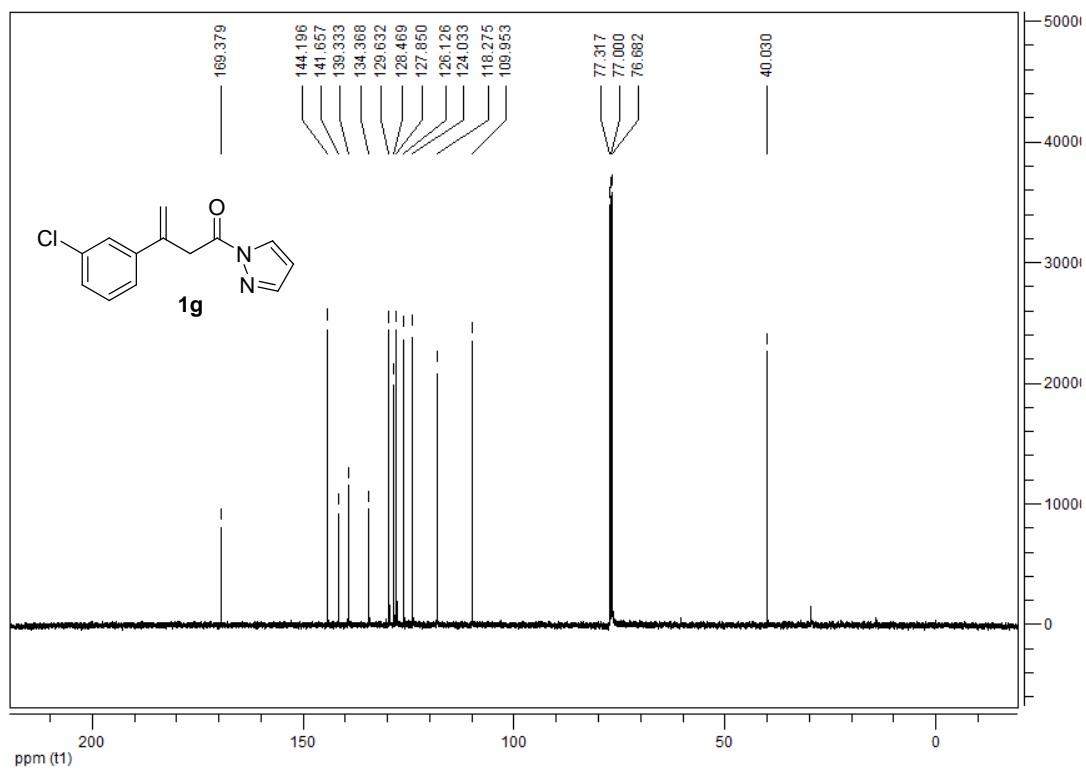

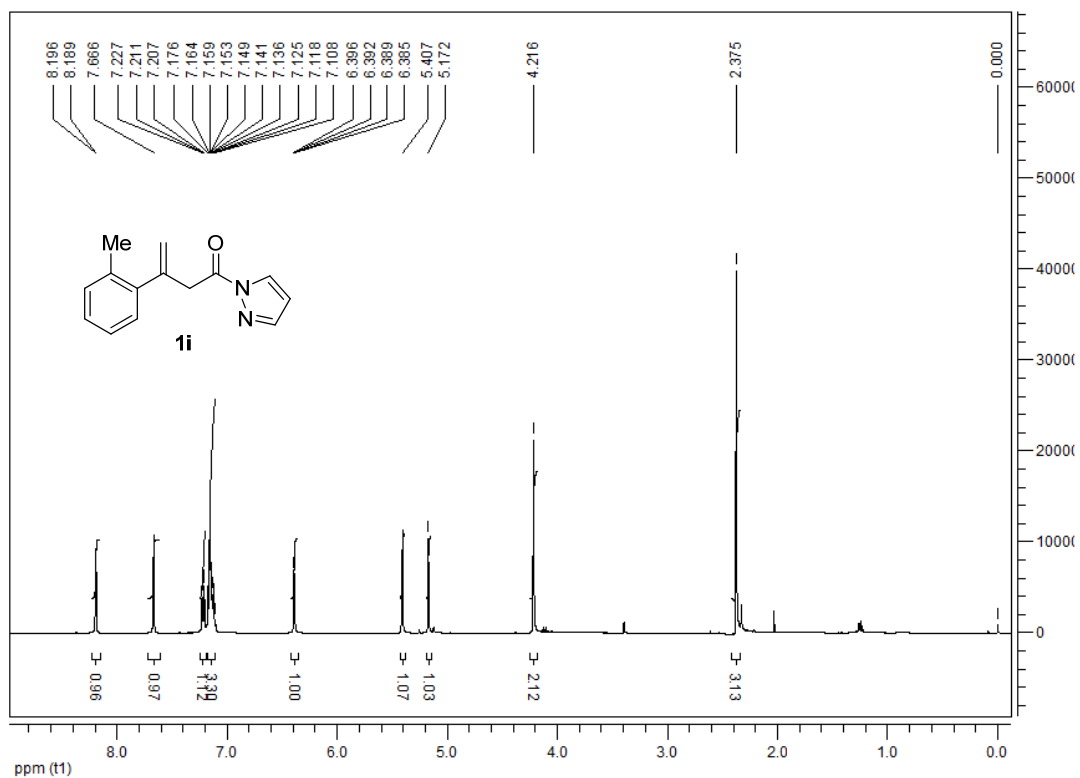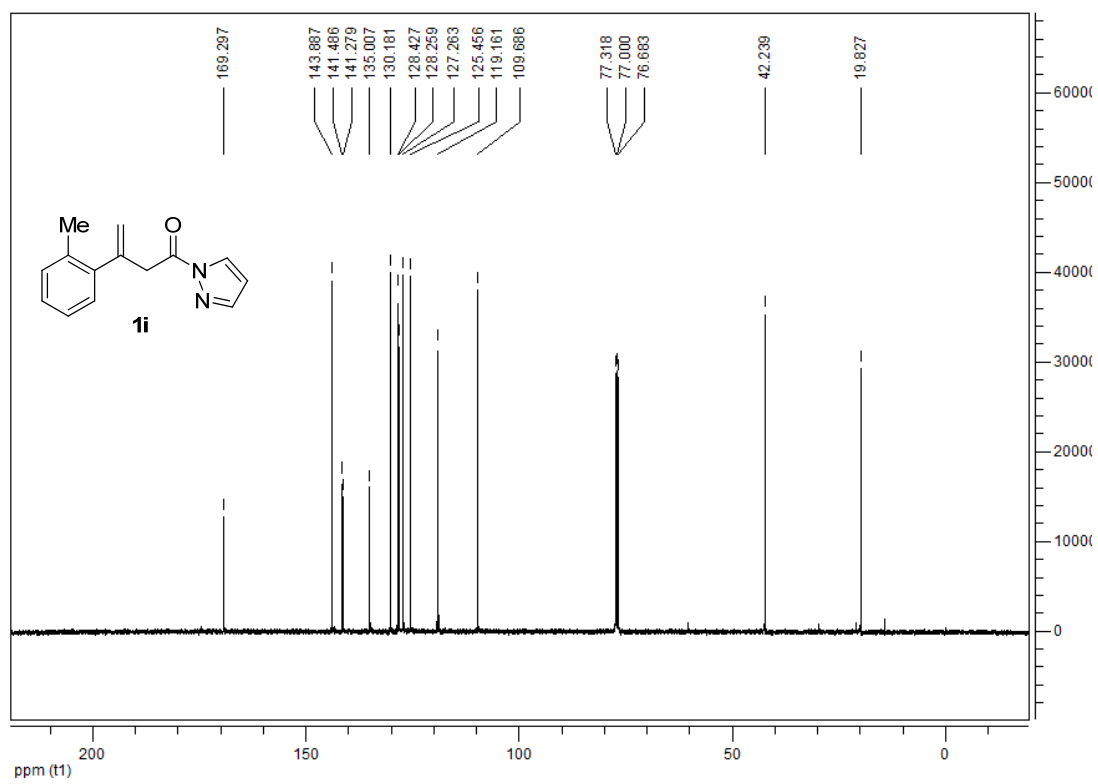



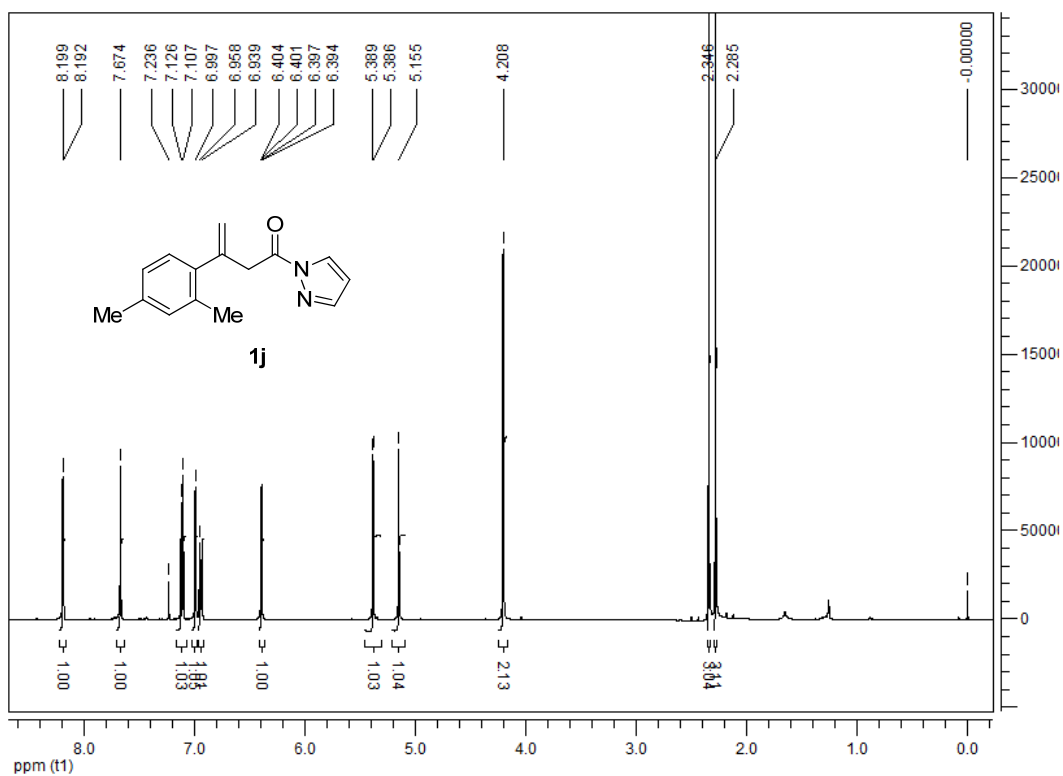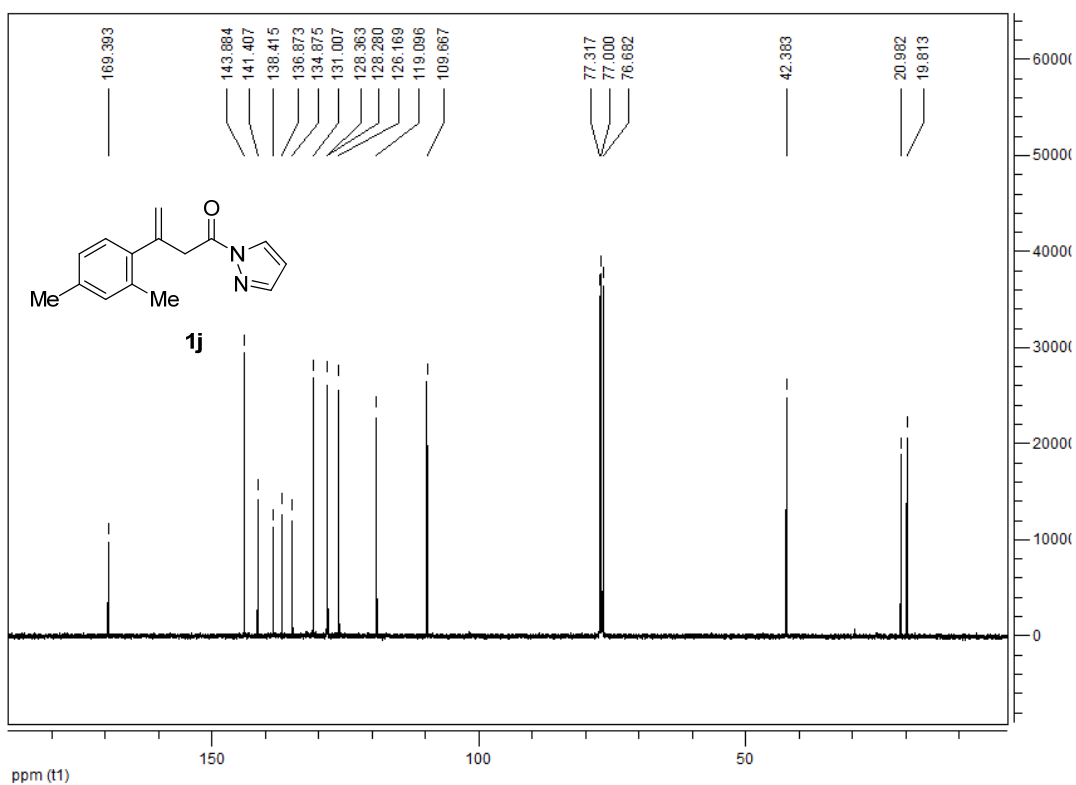

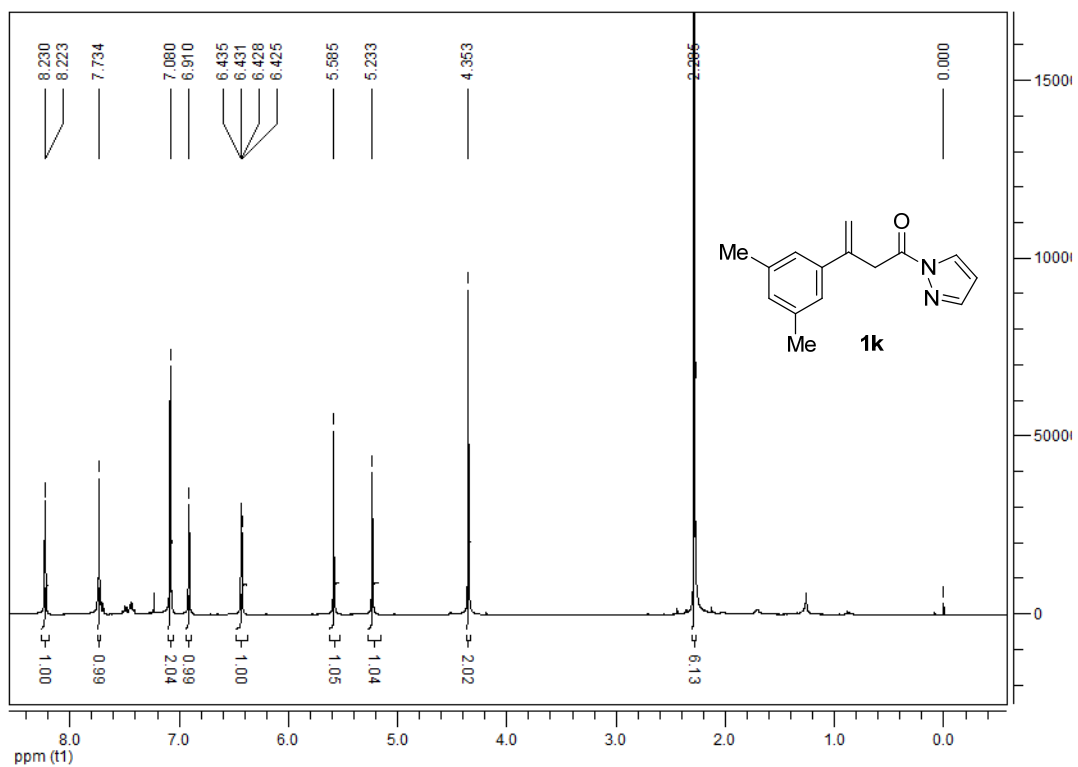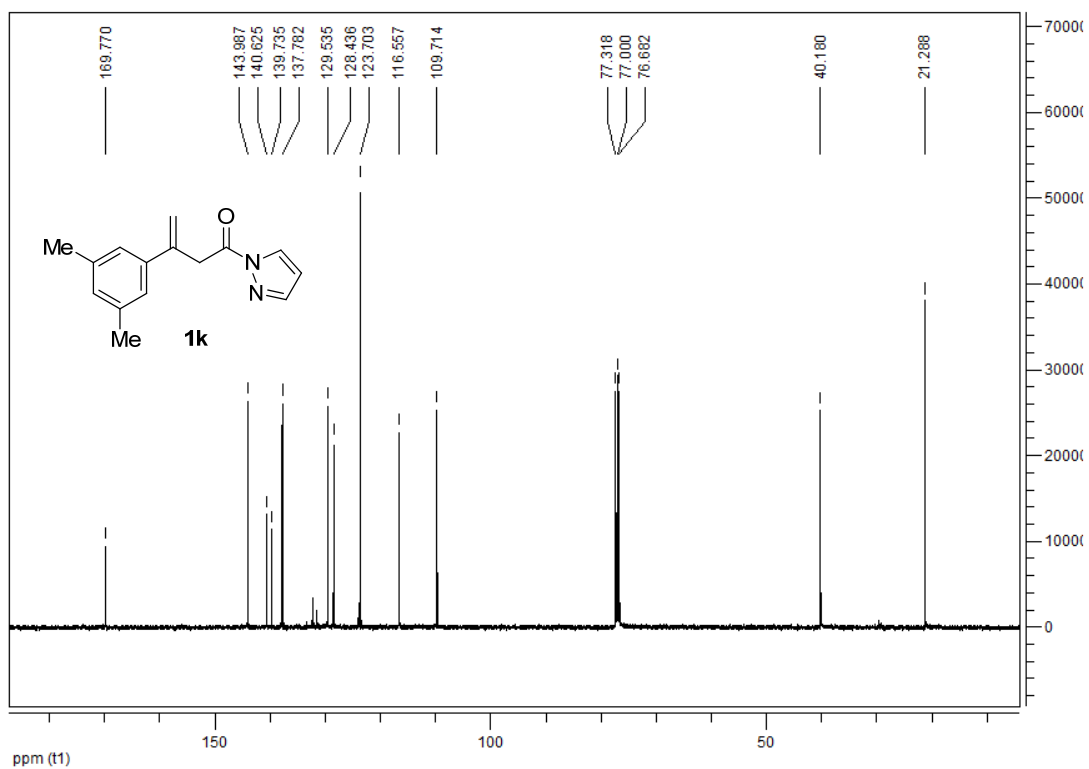

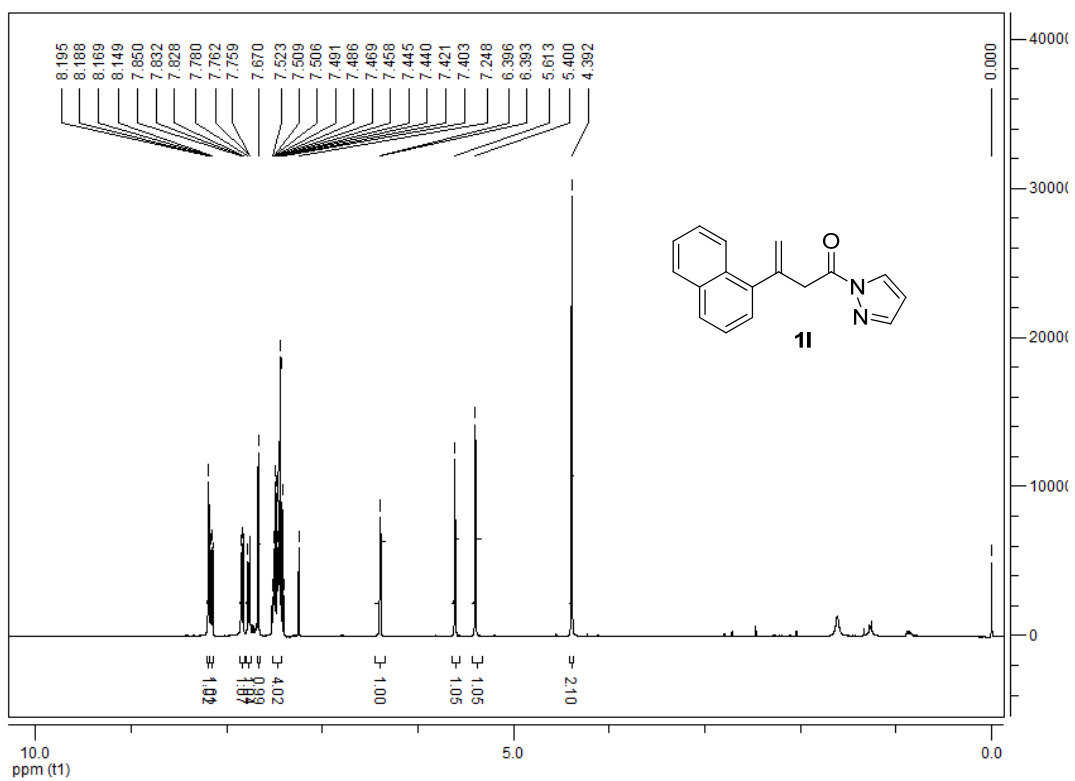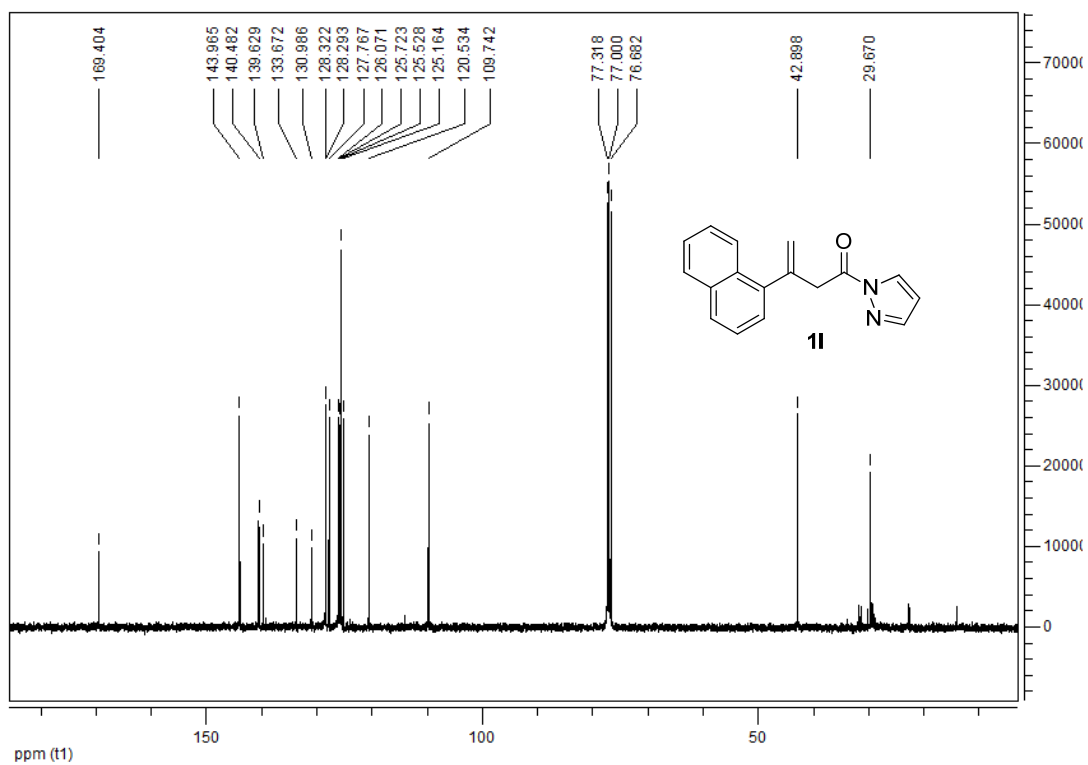

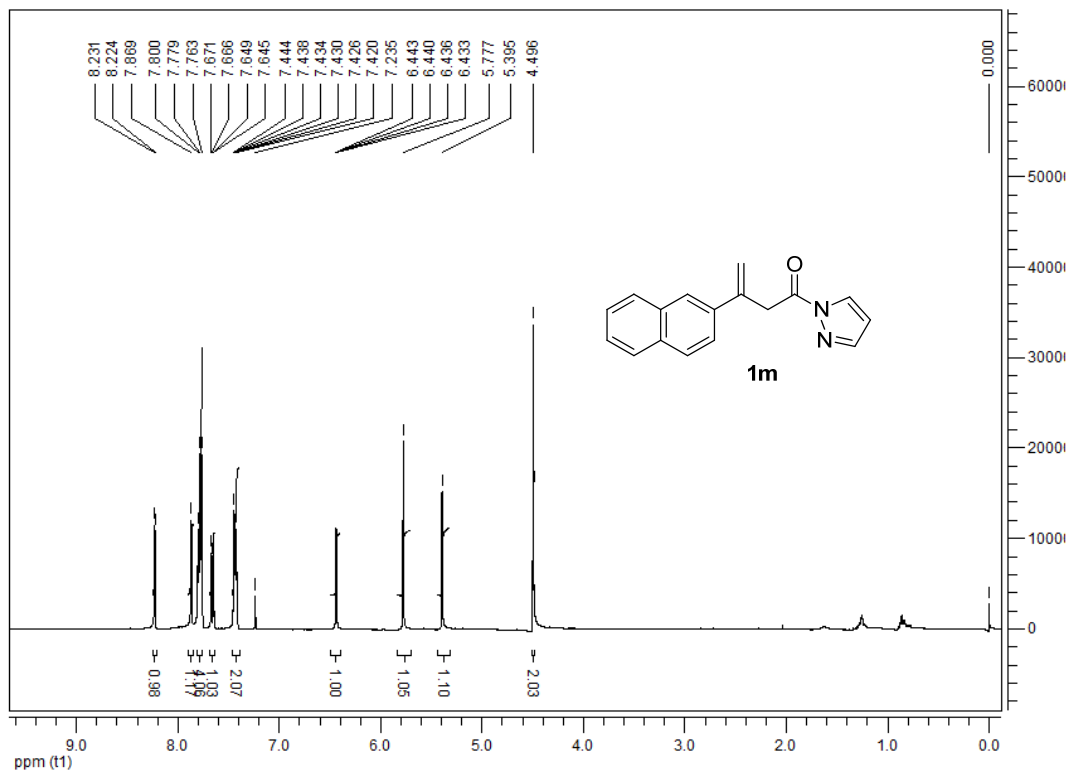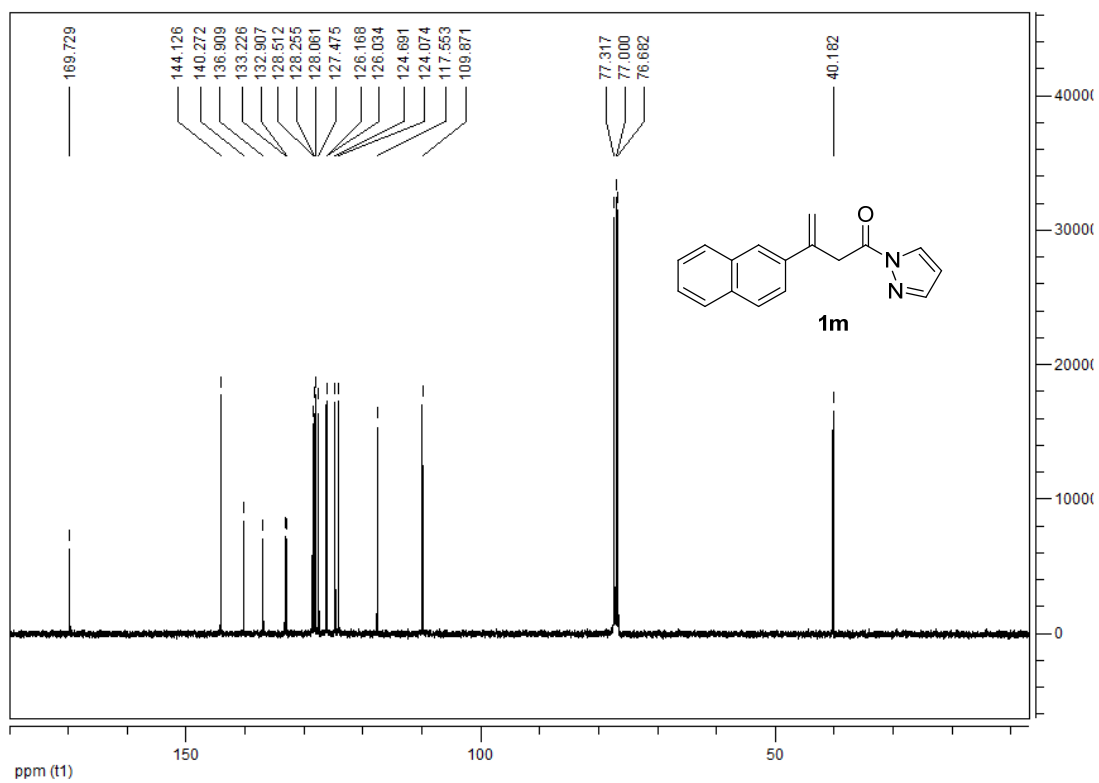

## 6. Copies of HPLC Spectra of the Products

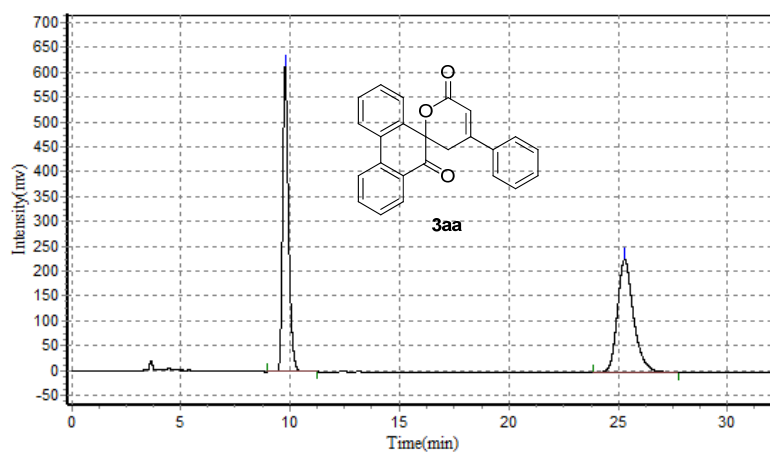

### Results

| Peak No.     | Peak ID | Ret Time | Height     | Area         | Conc.    |
|--------------|---------|----------|------------|--------------|----------|
| 1            |         | 9.787    | 614056.625 | 11459768.000 | 49.8236  |
| 2            |         | 25.293   | 226565.047 | 11540913.000 | 50.1764  |
| <b>Total</b> |         |          | 840621.672 | 23000681.000 | 100.0000 |

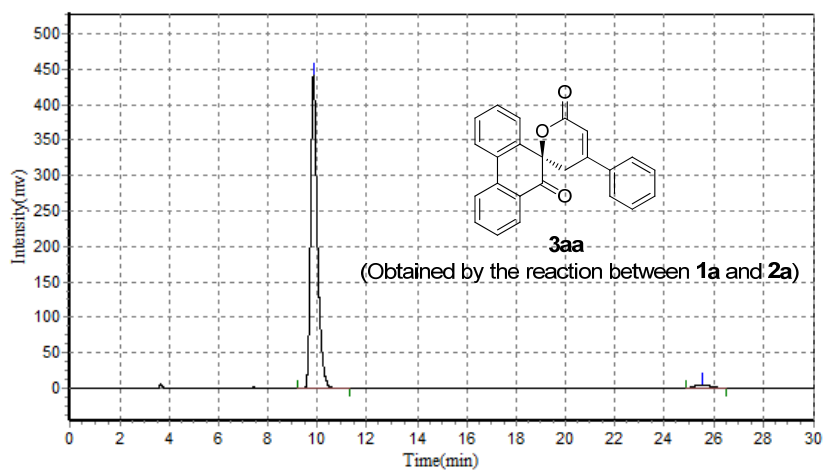

### Results

| Peak No.     | Peak ID | Ret Time | Height     | Area        | Conc.    |
|--------------|---------|----------|------------|-------------|----------|
| 1            |         | 9.843    | 441101.438 | 8406273.000 | 97.0717  |
| 2            |         | 25.515   | 5494.763   | 253585.656  | 2.9283   |
| <b>Total</b> |         |          | 446596.201 | 8659858.656 | 100.0000 |

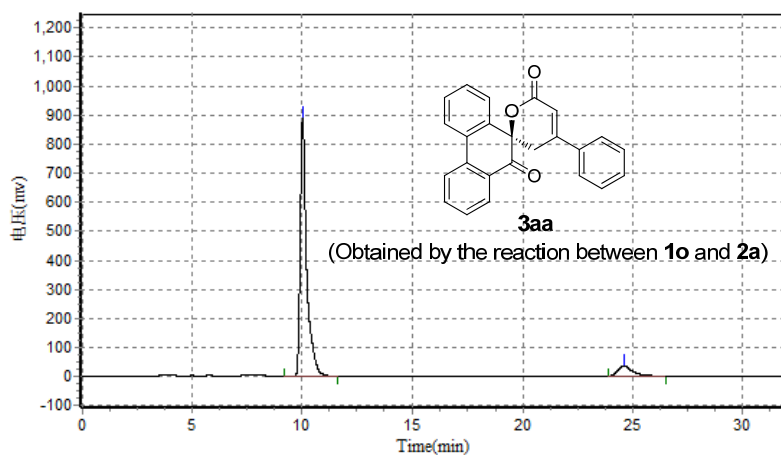

### Results

| Peak No.     | Peak ID | Ret Time | Height     | Area         | Conc.    |
|--------------|---------|----------|------------|--------------|----------|
| 1            |         | 10.042   | 886508.875 | 18035906.000 | 91.0204  |
| 2            |         | 24.618   | 35451.879  | 1779319.750  | 8.9796   |
| <b>Total</b> |         |          | 921960.754 | 19815225.750 | 100.0000 |

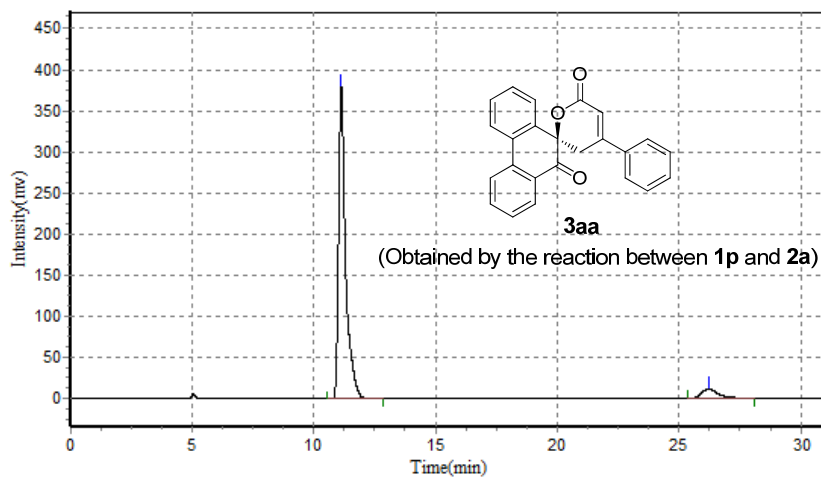

### Results

| Peak No.     | Peak ID | Ret Time | Height     | Area        | Conc.    |
|--------------|---------|----------|------------|-------------|----------|
| 1            |         | 11.138   | 379284.938 | 7627287.500 | 92.6262  |
| 2            |         | 26.213   | 11842.730  | 607197.063  | 7.3738   |
| <b>Total</b> |         |          | 391127.668 | 8234484.563 | 100.0000 |

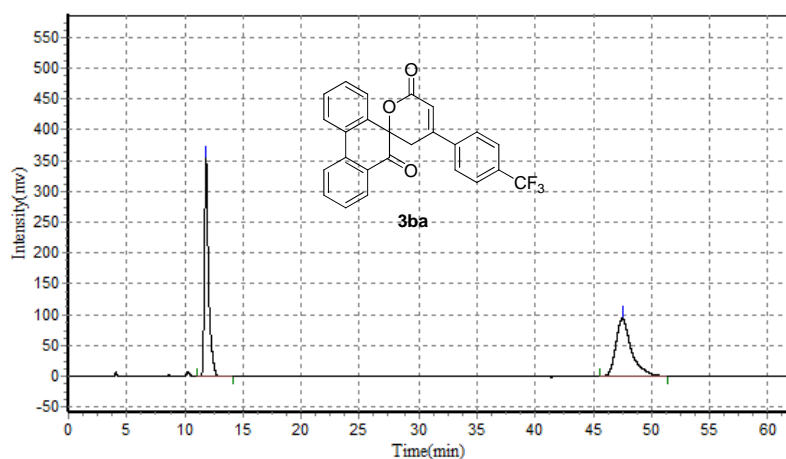

### Results

| Peak No.     | Peak ID | Ret Time | Height     | Area         | Conc.    |
|--------------|---------|----------|------------|--------------|----------|
| 1            |         | 11.822   | 352925.500 | 8687303.000  | 49.9594  |
| 2            |         | 47.482   | 93399.617  | 8701431.000  | 50.0406  |
| <b>Total</b> |         |          | 446325.117 | 17388734.000 | 100.0000 |

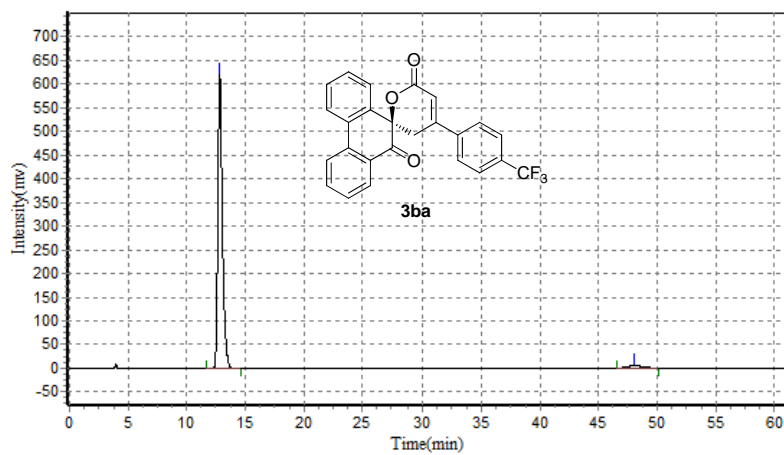

### Results

| Peak No.     | Peak ID | Ret Time | Height     | Area         | Conc.    |
|--------------|---------|----------|------------|--------------|----------|
| 1            |         | 12.820   | 618377.063 | 16484476.000 | 97.0281  |
| 2            |         | 48.098   | 5188.208   | 504906.656   | 2.9719   |
| <b>Total</b> |         |          | 623565.270 | 16989382.656 | 100.0000 |

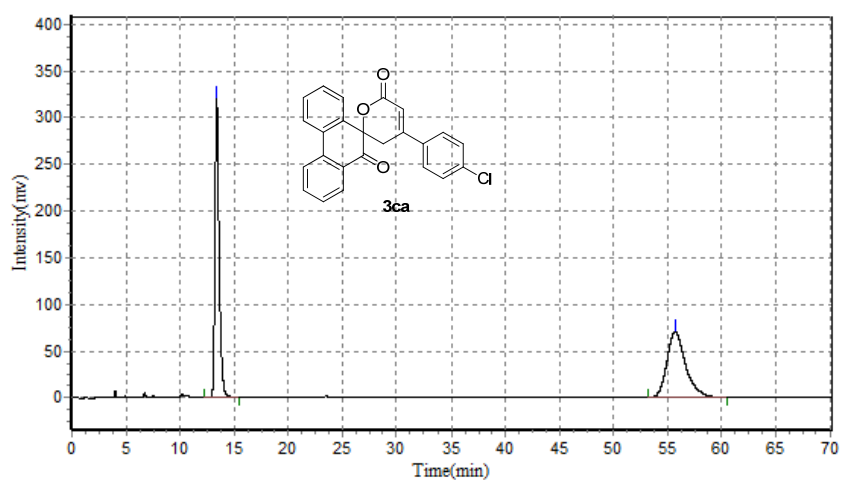

### Results

| Peak No.     | Peak ID | Ret Time | Height     | Area         | Conc.    |
|--------------|---------|----------|------------|--------------|----------|
| 1            |         | 13.362   | 318900.938 | 8480727.000  | 50.0689  |
| 2            |         | 55.713   | 70531.086  | 8457391.000  | 49.9311  |
| <b>Total</b> |         |          | 389432.023 | 16938118.000 | 100.0000 |

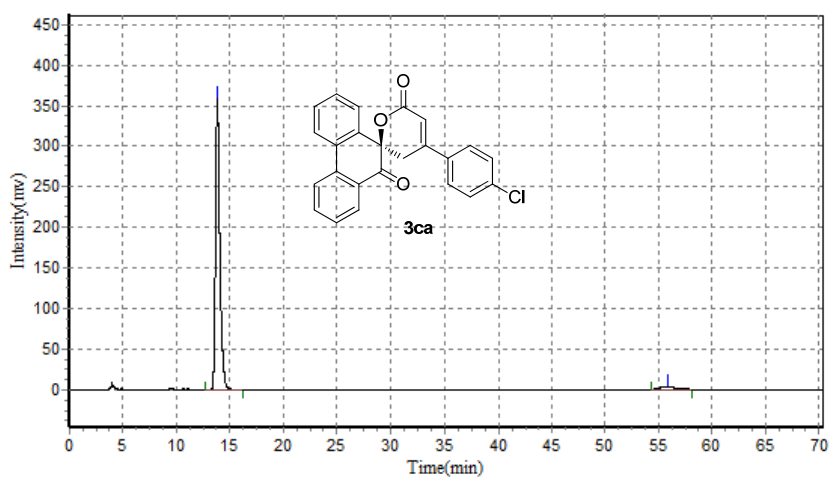

### Results

| Peak No.     | Peak ID | Ret Time | Height     | Area         | Conc.    |
|--------------|---------|----------|------------|--------------|----------|
| 1            |         | 13.825   | 358604.813 | 10036490.000 | 96.9098  |
| 2            |         | 55.788   | 3146.996   | 320035.406   | 3.0902   |
| <b>Total</b> |         |          | 361751.809 | 10356525.406 | 100.0000 |



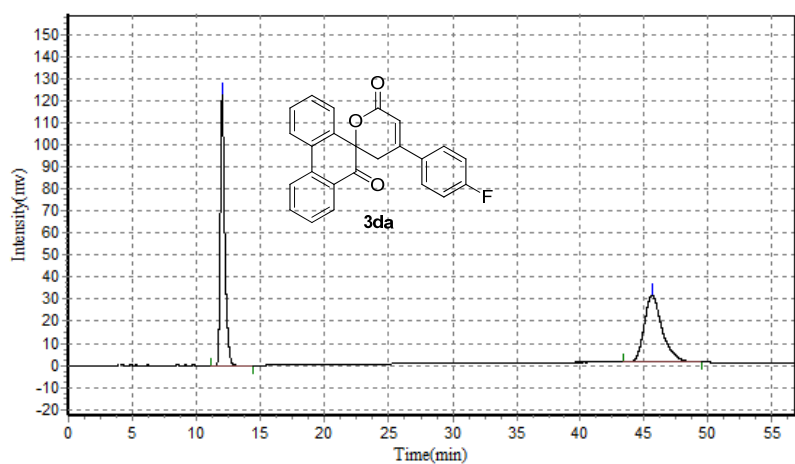

### Results

| Peak No.     | Peak ID | Ret Time | Height     | Area        | Conc.    |
|--------------|---------|----------|------------|-------------|----------|
| 1            |         | 12.033   | 122721.438 | 2973482.250 | 49.9809  |
| 2            |         | 45.600   | 30417.834  | 2975754.500 | 50.0191  |
| <b>Total</b> |         |          | 153139.271 | 5949236.750 | 100.0000 |

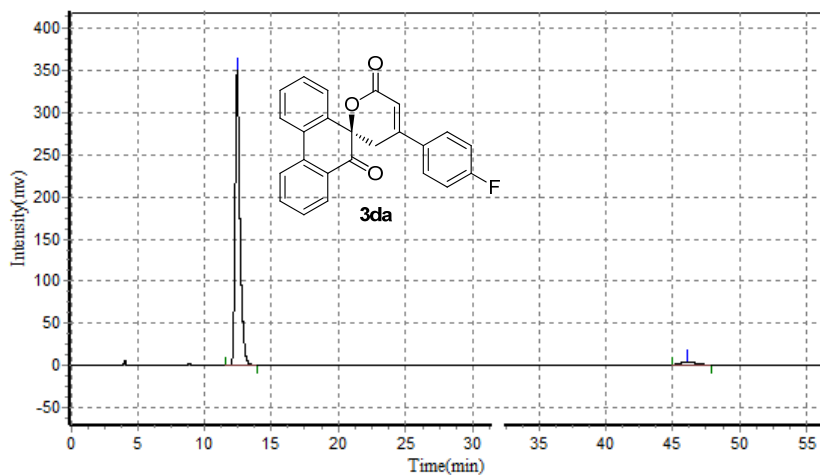

### Results

| Peak No.     | Peak ID | Ret Time | Height     | Area        | Conc.    |
|--------------|---------|----------|------------|-------------|----------|
| 1            |         | 12.425   | 350057.000 | 8807251.000 | 96.5882  |
| 2            |         | 46.083   | 3812.679   | 311100.500  | 3.4118   |
| <b>Total</b> |         |          | 353869.679 | 9118351.500 | 100.0000 |

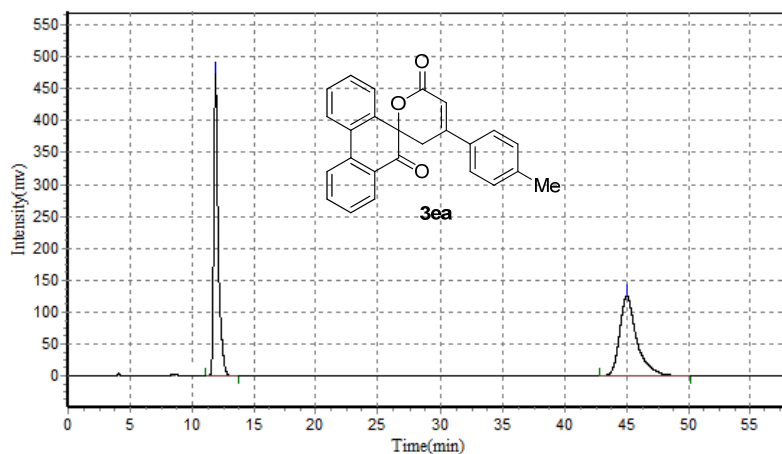

### Results

| Peak No.     | Peak ID | Ret Time | Height     | Area         | Conc.    |
|--------------|---------|----------|------------|--------------|----------|
| 1            |         | 11.907   | 473451.594 | 11760662.000 | 49.7555  |
| 2            |         | 45.020   | 124794.781 | 11876249.000 | 50.2445  |
| <b>Total</b> |         |          | 598246.375 | 23636911.000 | 100.0000 |

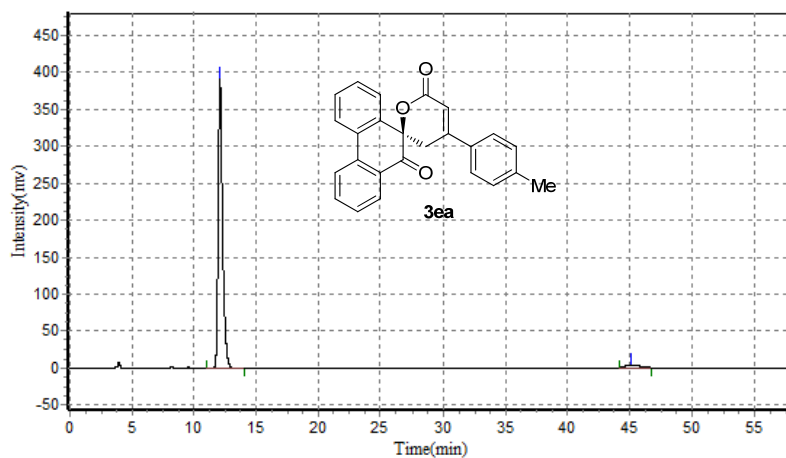

### Results

| Peak No.     | Peak ID | Ret Time | Height     | Area        | Conc.    |
|--------------|---------|----------|------------|-------------|----------|
| 1            |         | 12.093   | 391046.250 | 9477957.000 | 97.0902  |
| 2            |         | 45.143   | 3629.641   | 284057.500  | 2.9098   |
| <b>Total</b> |         |          | 394675.891 | 9762014.500 | 100.0000 |

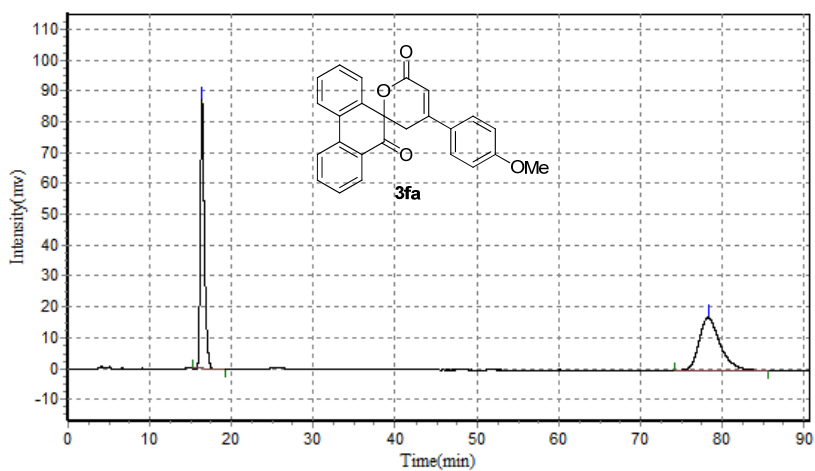

### Results

| Peak No.     | Peak ID | Ret Time | Height     | Area        | Conc.    |
|--------------|---------|----------|------------|-------------|----------|
| 1            |         | 16.398   | 87483.570  | 3022968.250 | 49.8464  |
| 2            |         | 78.285   | 17184.629  | 3041595.750 | 50.1536  |
| <b>Total</b> |         |          | 104668.199 | 6064564.000 | 100.0000 |

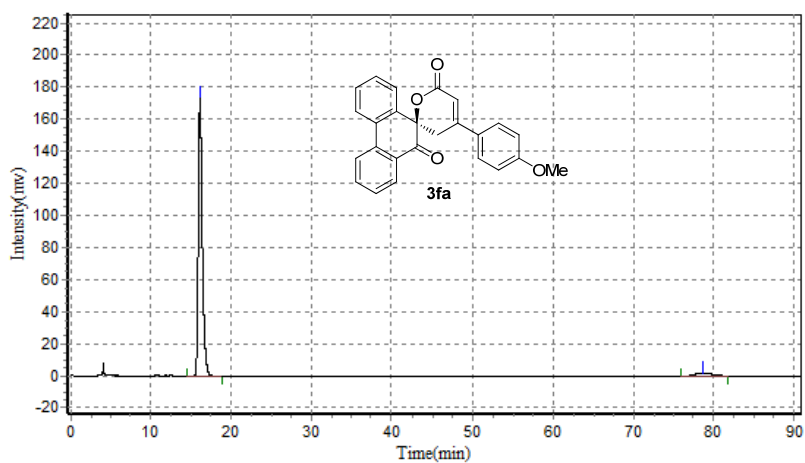

### Results

| Peak No.     | Peak ID | Ret Time | Height     | Area        | Conc.    |
|--------------|---------|----------|------------|-------------|----------|
| 1            |         | 16.120   | 173384.625 | 5967257.000 | 94.9591  |
| 2            |         | 78.690   | 2010.934   | 316773.219  | 5.0409   |
| <b>Total</b> |         |          | 175395.559 | 6284030.219 | 100.0000 |

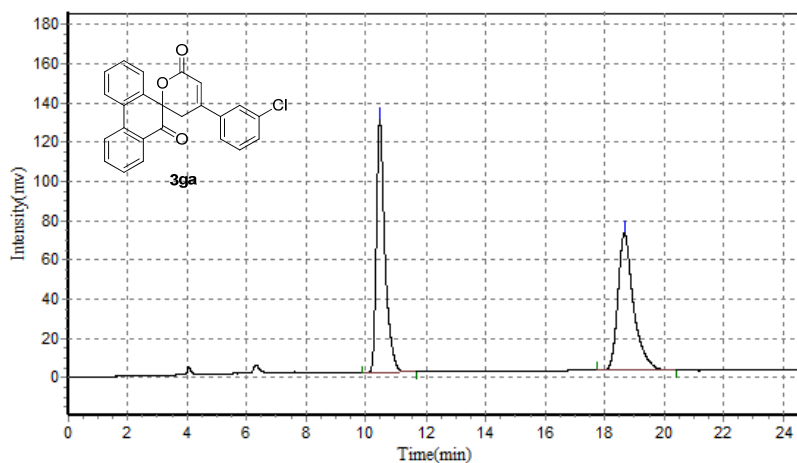

### Results

| Peak No.     | Peak ID | Ret Time | Height     | Area        | Conc.    |
|--------------|---------|----------|------------|-------------|----------|
| 1            |         | 10.468   | 128228.156 | 2545953.750 | 50.2039  |
| 2            |         | 18.648   | 69484.398  | 2525268.750 | 49.7961  |
| <b>Total</b> |         |          | 197712.555 | 5071222.500 | 100.0000 |

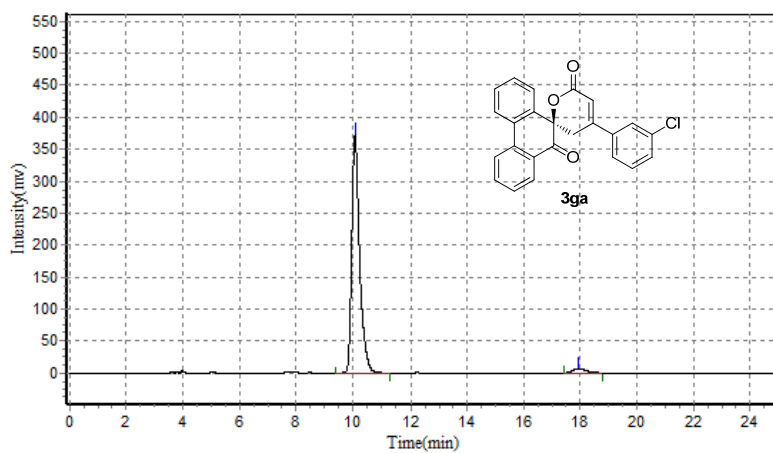

### Results

| Peak No.     | Peak ID | Ret Time | Height     | Area        | Conc.    |
|--------------|---------|----------|------------|-------------|----------|
| 1            |         | 10.083   | 371566.625 | 7147675.000 | 96.8840  |
| 2            |         | 17.932   | 6964.065   | 229886.297  | 3.1160   |
| <b>Total</b> |         |          | 378530.690 | 7377561.297 | 100.0000 |

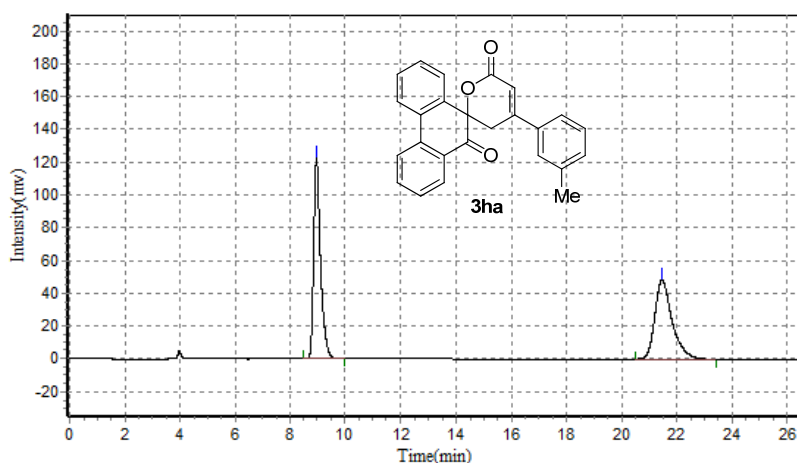

### Results

| Peak No.     | Peak ID | Ret Time | Height     | Area        | Conc.    |
|--------------|---------|----------|------------|-------------|----------|
| 1            |         | 8.960    | 122149.836 | 2098938.000 | 50.0288  |
| 2            |         | 21.470   | 48166.941  | 2096522.625 | 49.9712  |
| <b>Total</b> |         |          | 170316.777 | 4195460.625 | 100.0000 |

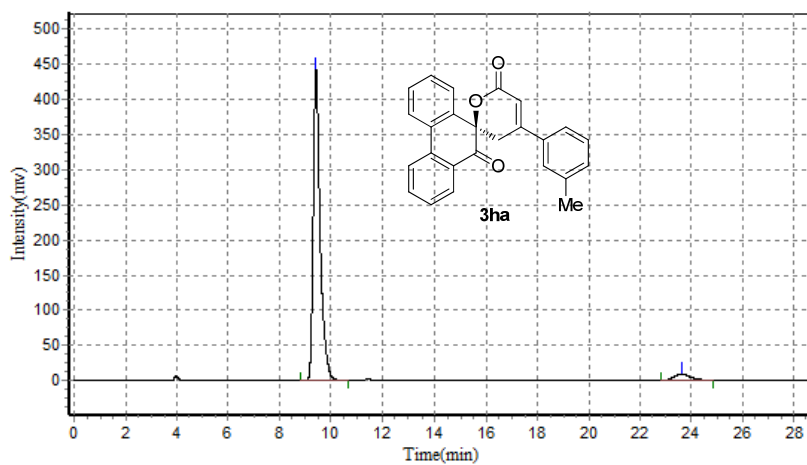

### Results

| Peak No.     | Peak ID | Ret Time | Height     | Area        | Conc.    |
|--------------|---------|----------|------------|-------------|----------|
| 1            |         | 9.427    | 442152.469 | 8272815.500 | 94.9507  |
| 2            |         | 23.617   | 9367.438   | 439930.938  | 5.0493   |
| <b>Total</b> |         |          | 451519.906 | 8712746.438 | 100.0000 |

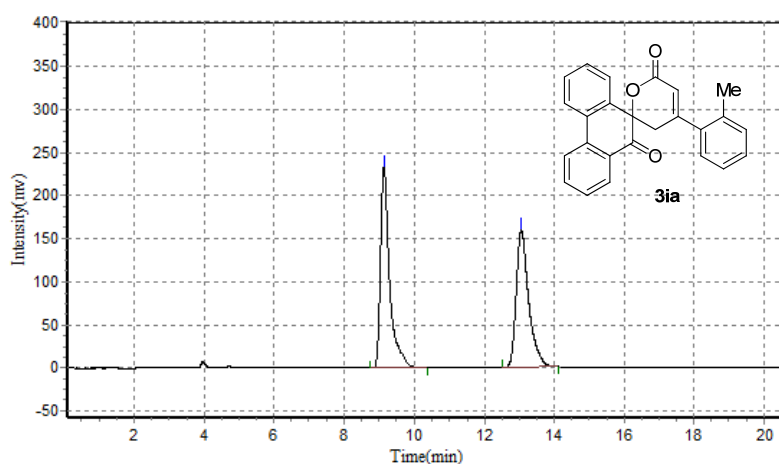

### Results

| Peak No.     | Peak ID | Ret Time | Height     | Area        | Conc.    |
|--------------|---------|----------|------------|-------------|----------|
| 1            |         | 9.150    | 232545.734 | 4162264.500 | 51.7468  |
| 2            |         | 13.050   | 158516.094 | 3881248.250 | 48.2531  |
| <b>Total</b> |         |          | 391061.828 | 8043512.750 | 100.0000 |

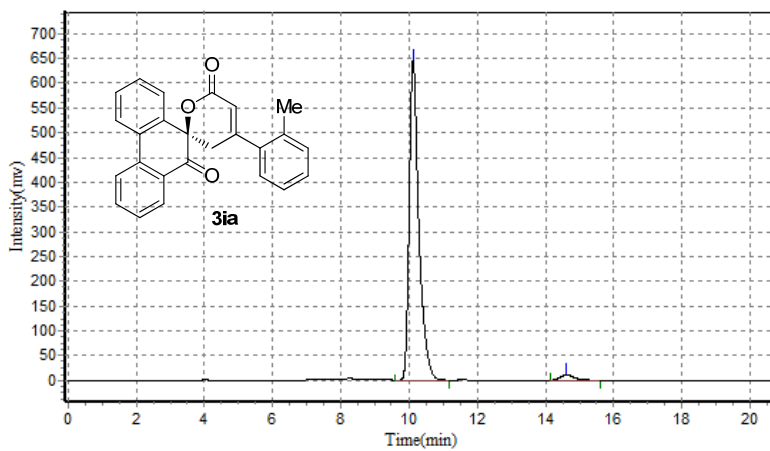

### Results

| Peak No.     | Peak ID | Ret Time | Height     | Area         | Conc.    |
|--------------|---------|----------|------------|--------------|----------|
| 1            |         | 10.097   | 644757.625 | 12733394.000 | 97.5038  |
| 2            |         | 14.612   | 11252.168  | 325994.094   | 2.4962   |
| <b>Total</b> |         |          | 656009.793 | 13059388.094 | 100.0000 |

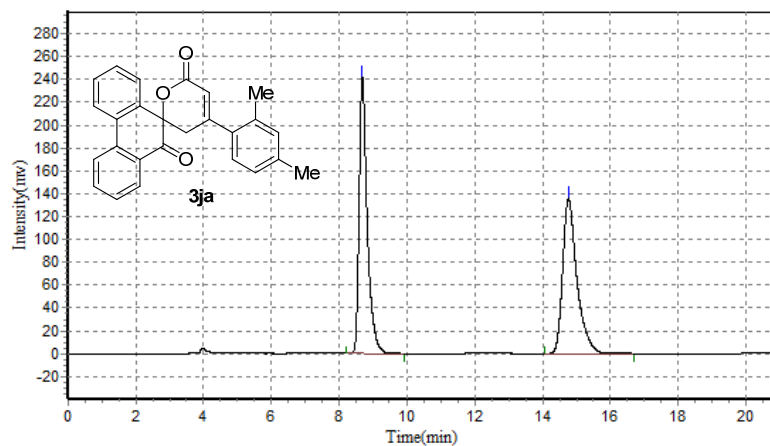

### Results

| Peak No.     | Peak ID | Ret Time | Height     | Area        | Conc.    |
|--------------|---------|----------|------------|-------------|----------|
| 1            |         | 8.705    | 240728.969 | 3999984.750 | 49.9831  |
| 2            |         | 14.767   | 135655.547 | 4002692.250 | 50.0169  |
| <b>Total</b> |         |          | 376384.516 | 8002677.000 | 100.0000 |

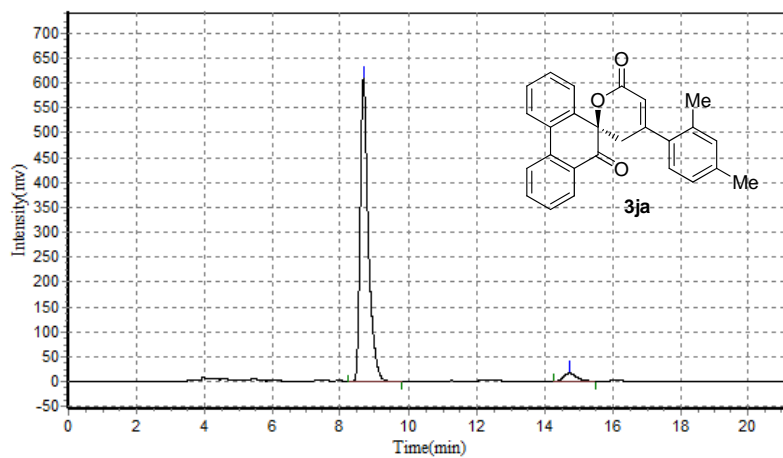

### Results

| Peak No.     | Peak ID | Ret Time | Height     | Area         | Conc.    |
|--------------|---------|----------|------------|--------------|----------|
| 1            |         | 8.695    | 607132.188 | 10085407.000 | 95.5065  |
| 2            |         | 14.725   | 17143.426  | 474504.906   | 4.4935   |
| <b>Total</b> |         |          | 624275.613 | 10559911.906 | 100.0000 |

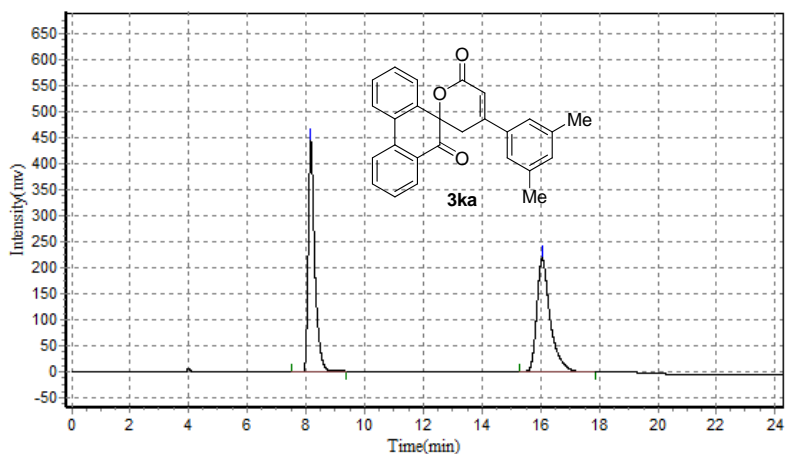

### Results

| Peak No.     | Peak ID | Ret Time | Height     | Area         | Conc.    |
|--------------|---------|----------|------------|--------------|----------|
| 1            |         | 8.175    | 442282.250 | 6838692.500  | 49.9758  |
| 2            |         | 16.040   | 217645.438 | 6845320.500  | 50.0242  |
| <b>Total</b> |         |          | 659927.688 | 13684013.000 | 100.0000 |

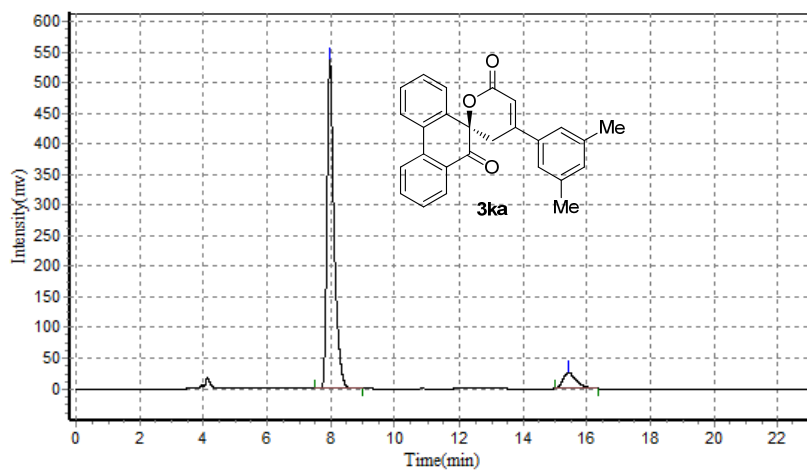

### Results

| Peak No.     | Peak ID | Ret Time | Height     | Area        | Conc.    |
|--------------|---------|----------|------------|-------------|----------|
| 1            |         | 7.978    | 537153.500 | 8237559.000 | 91.5416  |
| 2            |         | 15.427   | 25817.561  | 761146.875  | 8.4584   |
| <b>Total</b> |         |          | 562971.061 | 8998705.875 | 100.0000 |



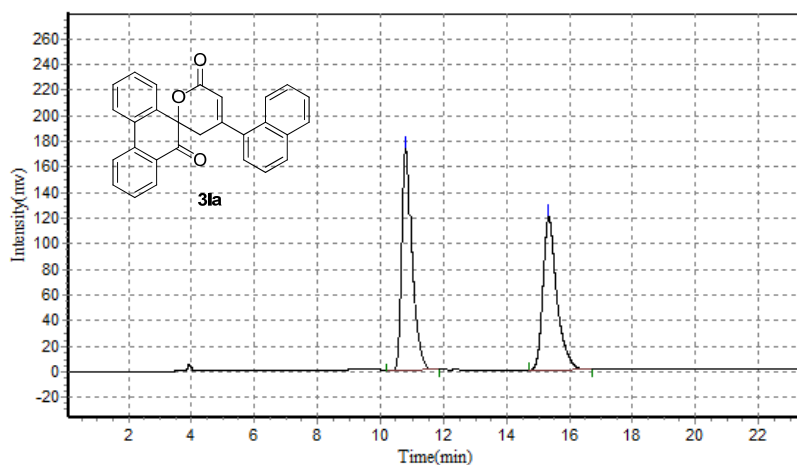

### Results

| Peak No.     | Peak ID | Ret Time | Height     | Area        | Conc.    |
|--------------|---------|----------|------------|-------------|----------|
| 1            |         | 10.822   | 172802.094 | 3651731.500 | 49.9402  |
| 2            |         | 15.338   | 119222.945 | 3660472.750 | 50.0598  |
| <b>Total</b> |         |          | 292025.039 | 7312204.250 | 100.0000 |

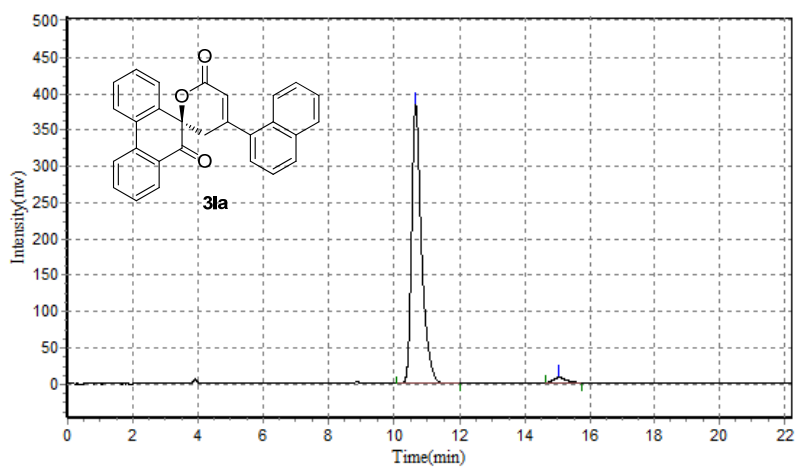

### Results

| Peak No.     | Peak ID | Ret Time | Height     | Area        | Conc.    |
|--------------|---------|----------|------------|-------------|----------|
| 1            |         | 10.650   | 383202.250 | 8122290.000 | 97.3885  |
| 2            |         | 15.050   | 7759.125   | 217797.094  | 2.6114   |
| <b>Total</b> |         |          | 390961.375 | 8340087.094 | 100.0000 |

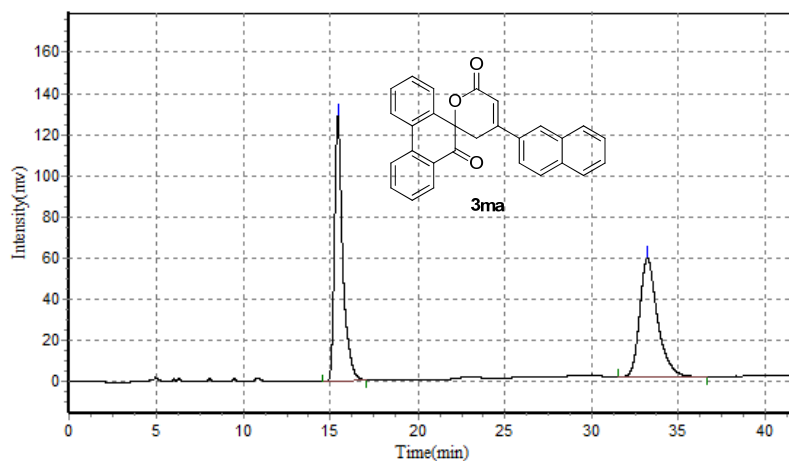

### Results

| Peak No.     | Peak ID | Ret Time | Height     | Area        | Conc.    |
|--------------|---------|----------|------------|-------------|----------|
| 1            |         | 15.453   | 128554.656 | 4251031.500 | 50.9729  |
| 2            |         | 33.203   | 57484.504  | 4088757.250 | 49.0271  |
| <b>Total</b> |         |          | 186039.160 | 8339788.750 | 100.0000 |

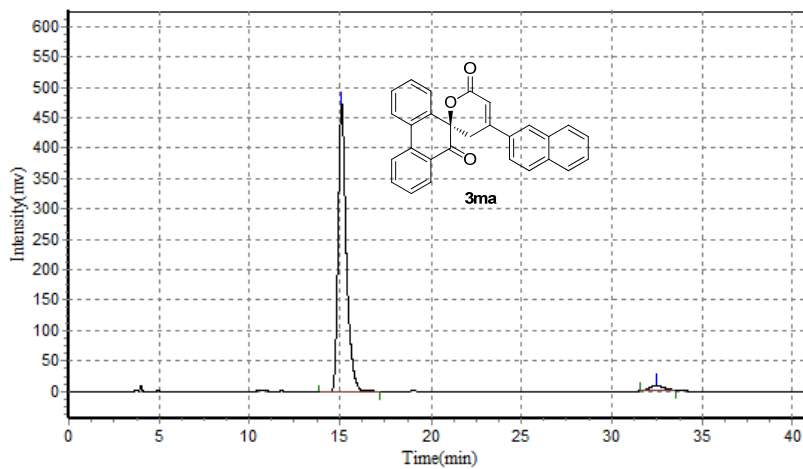

### Results

| Peak No.     | Peak ID | Ret Time | Height     | Area         | Conc.    |
|--------------|---------|----------|------------|--------------|----------|
| 1            |         | 15.112   | 472055.219 | 14827618.000 | 97.0667  |
| 2            |         | 32.477   | 7806.026   | 448087.313   | 2.9333   |
| <b>Total</b> |         |          | 479861.245 | 15275705.313 | 100.0000 |

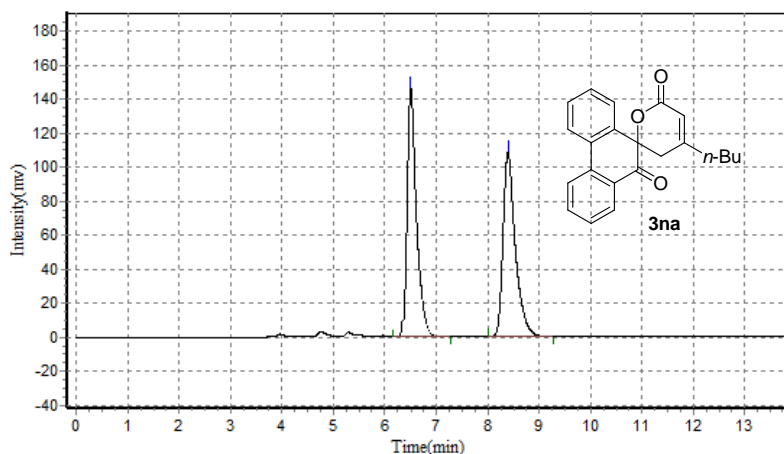

### Results

| Peak No.     | Peak ID | Ret Time | Height     | Area        | Conc.    |
|--------------|---------|----------|------------|-------------|----------|
| 1            |         | 6.492    | 145743.969 | 1812056.625 | 50.4990  |
| 2            |         | 8.388    | 107784.805 | 1776244.375 | 49.5010  |
| <b>Total</b> |         |          | 253528.773 | 3588301.000 | 100.0000 |

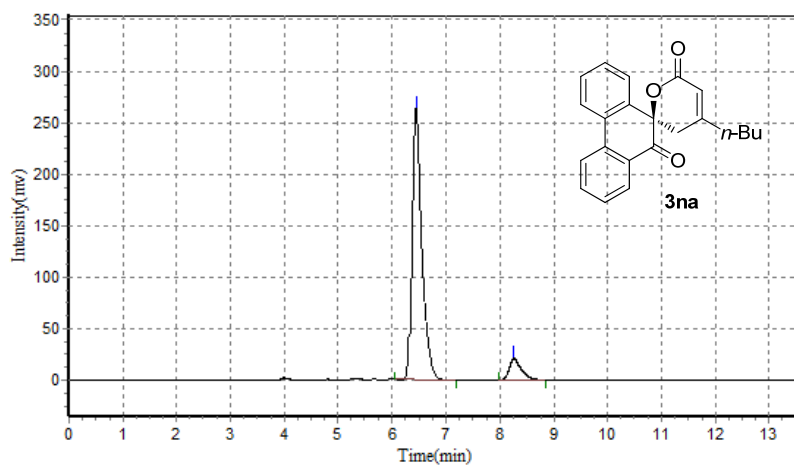

### Results

| Peak No.     | Peak ID | Ret Time | Height     | Area        | Conc.    |
|--------------|---------|----------|------------|-------------|----------|
| 1            |         | 6.432    | 264272.781 | 3196601.500 | 90.8497  |
| 2            |         | 8.257    | 20618.816  | 321958.688  | 9.1503   |
| <b>Total</b> |         |          | 284891.598 | 3518560.188 | 100.0000 |

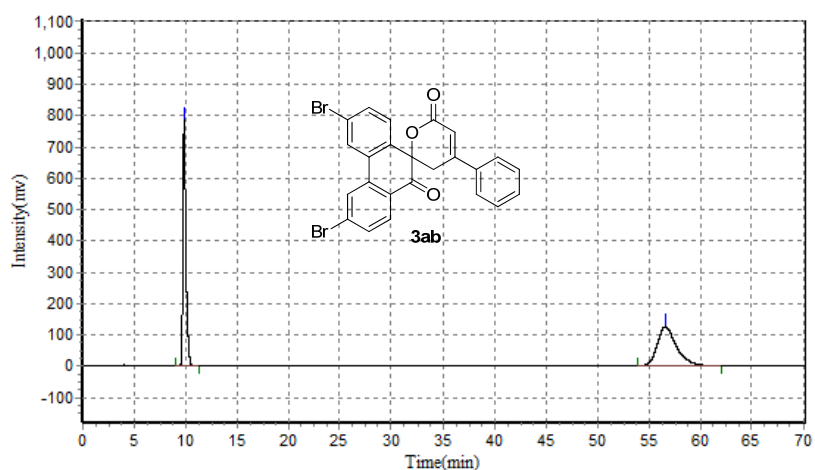

### Results

| Peak No.     | Peak ID | Ret Time | Height     | Area         | Conc.    |
|--------------|---------|----------|------------|--------------|----------|
| 1            |         | 9.860    | 784427.000 | 15744093.000 | 49.6956  |
| 2            |         | 56.612   | 124367.352 | 15936948.000 | 50.3044  |
| <b>Total</b> |         |          | 908794.352 | 31681041.000 | 100.0000 |

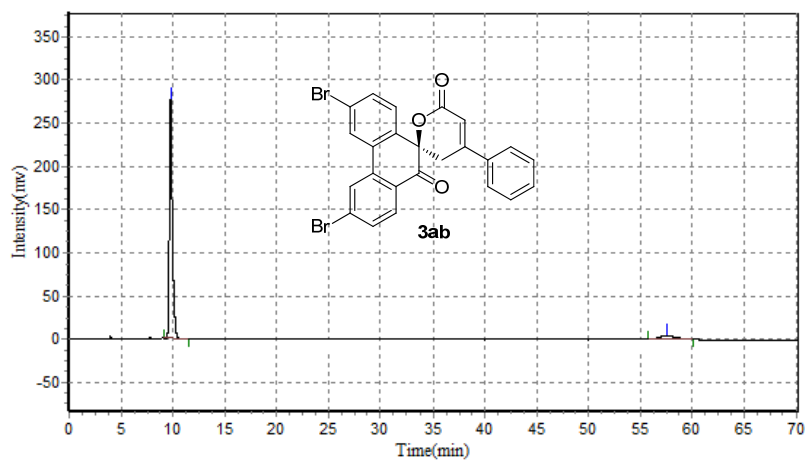

### Results

| Peak No.     | Peak ID | Ret Time | Height     | Area        | Conc.    |
|--------------|---------|----------|------------|-------------|----------|
| 1            |         | 9.785    | 275815.781 | 5525684.500 | 91.6451  |
| 2            |         | 57.542   | 4347.846   | 503757.031  | 8.3550   |
| <b>Total</b> |         |          | 280163.627 | 6029441.531 | 100.0000 |

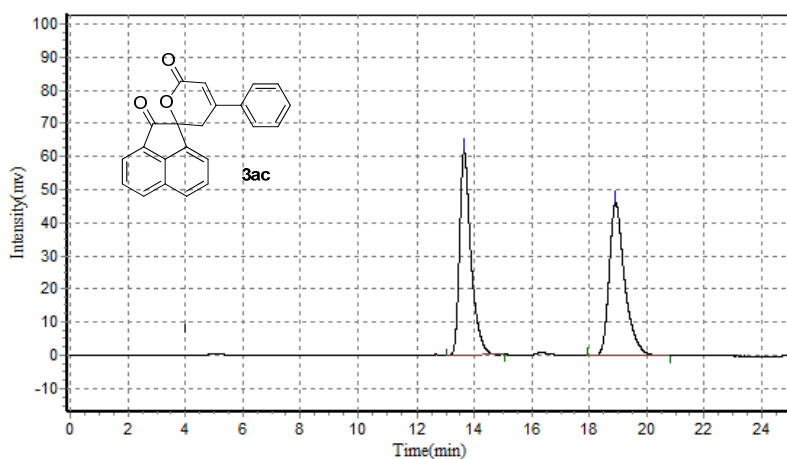

### Results

| Peak No.     | Peak ID | Ret Time | Height     | Area        | Conc.    |
|--------------|---------|----------|------------|-------------|----------|
| 1            |         | 13.647   | 61633.969  | 1692879.250 | 49.4071  |
| 2            |         | 18.915   | 46321.141  | 1733511.625 | 50.5929  |
| <b>Total</b> |         |          | 107955.109 | 3426390.875 | 100.0000 |

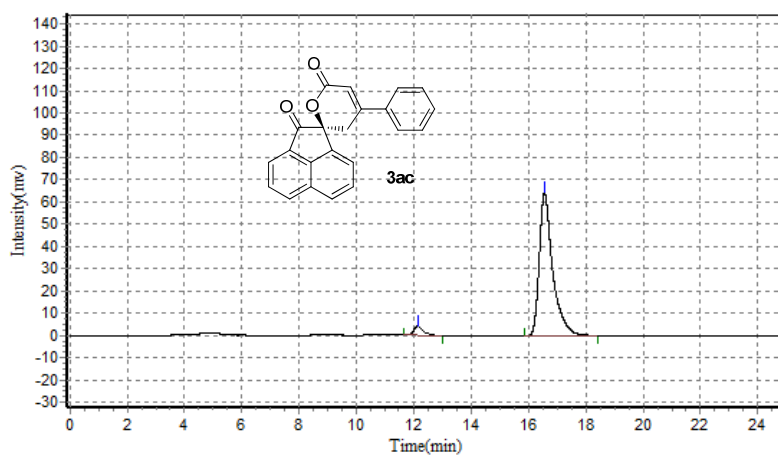

### Results

| Peak No.     | Peak ID | Ret Time | Height    | Area        | Conc.    |
|--------------|---------|----------|-----------|-------------|----------|
| 1            |         | 12.120   | 4236.203  | 98790.000   | 4.5078   |
| 2            |         | 16.550   | 64277.090 | 2092741.625 | 95.4922  |
| <b>Total</b> |         |          | 68513.293 | 2191531.625 | 100.0000 |

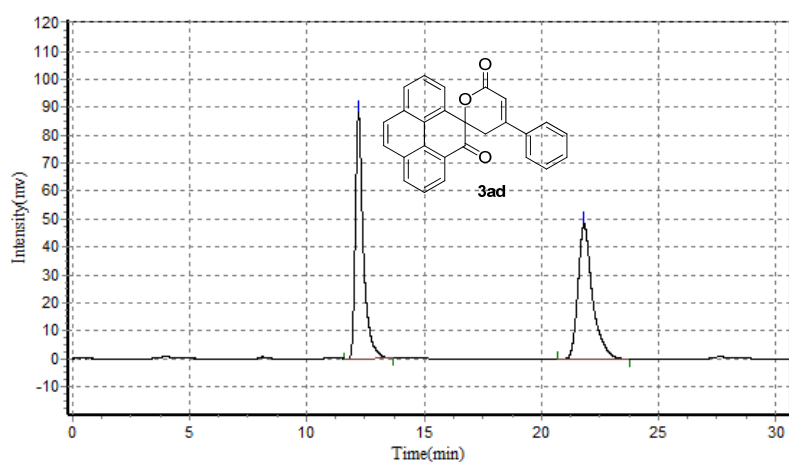

### Results

| Peak No.     | Peak ID | Ret Time | Height     | Area        | Conc.    |
|--------------|---------|----------|------------|-------------|----------|
| 1            |         | 12.222   | 87919.195  | 2085330.250 | 50.0901  |
| 2            |         | 21.822   | 48294.289  | 2077827.625 | 49.9099  |
| <b>Total</b> |         |          | 136213.484 | 4163157.875 | 100.0000 |

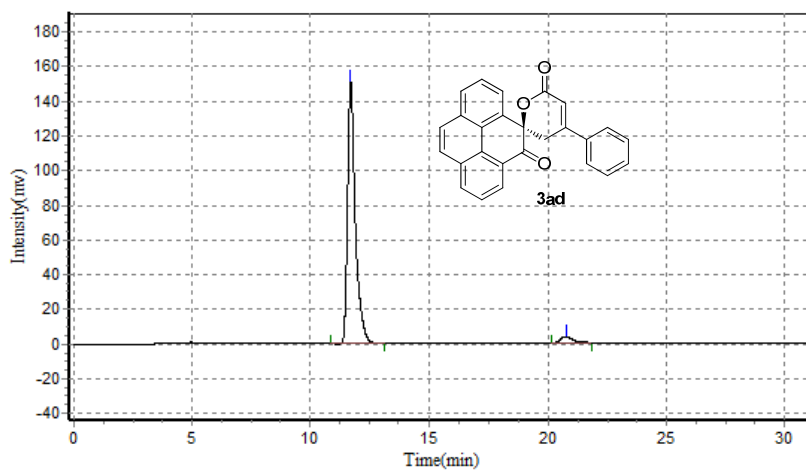

### Results

| Peak No.     | Peak ID | Ret Time | Height     | Area        | Conc.    |
|--------------|---------|----------|------------|-------------|----------|
| 1            |         | 11.715   | 151129.656 | 3459215.250 | 95.9600  |
| 2            |         | 20.758   | 3619.608   | 145635.297  | 4.0400   |
| <b>Total</b> |         |          | 154749.264 | 3604850.547 | 100.0000 |

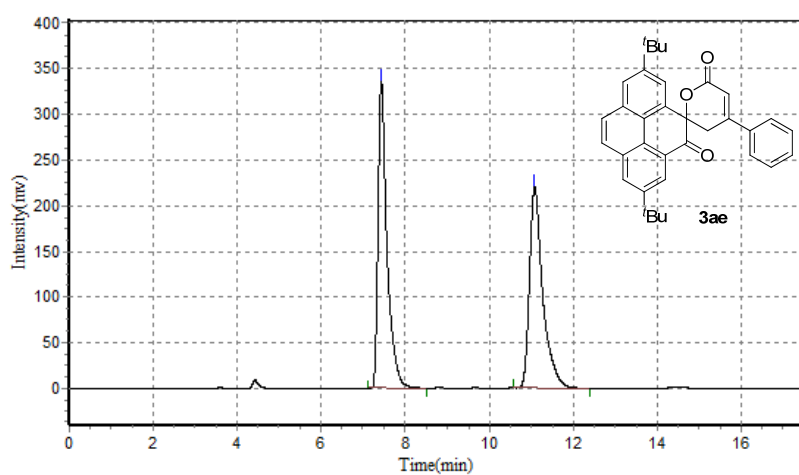

### Results

| Peak No.     | Peak ID | Ret Time | Height     | Area        | Conc.    |
|--------------|---------|----------|------------|-------------|----------|
| 1            |         | 7.445    | 335864.563 | 4944200.500 | 50.5846  |
| 2            |         | 11.072   | 219642.719 | 4829914.500 | 49.4154  |
| <b>Total</b> |         |          | 555507.281 | 9774115.000 | 100.0000 |

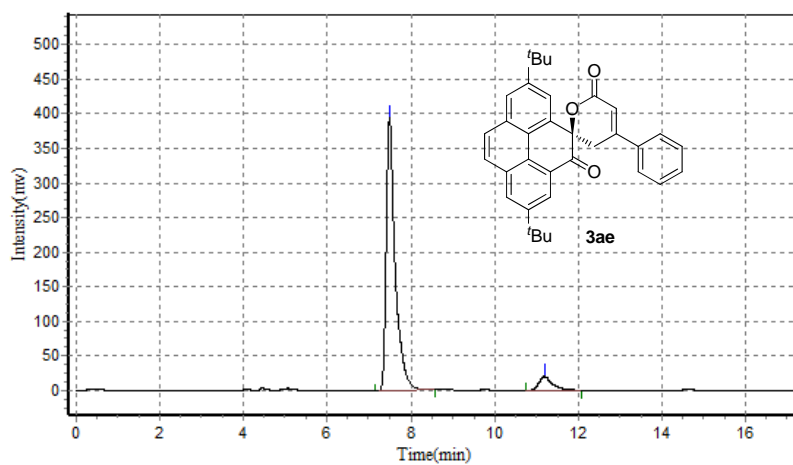

### Results

| Peak No.     | Peak ID | Ret Time | Height     | Area        | Conc.    |
|--------------|---------|----------|------------|-------------|----------|
| 1            |         | 7.500    | 394601.781 | 5838946.500 | 92.9311  |
| 2            |         | 11.175   | 19954.115  | 444146.750  | 7.0689   |
| <b>Total</b> |         |          | 414555.896 | 6283093.250 | 100.0000 |

## 7. The Data for the Deuterium Experiment

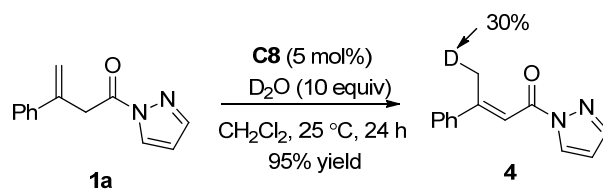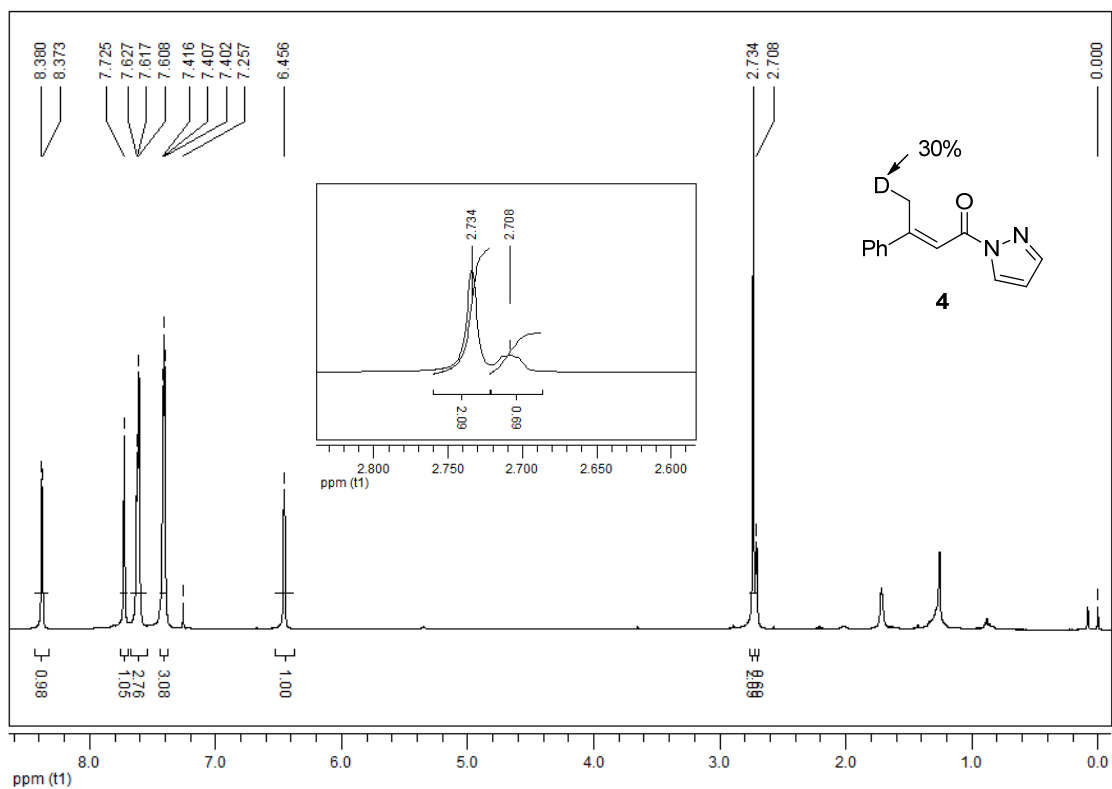



## 8. X-Ray Analysis of Compound 3ca

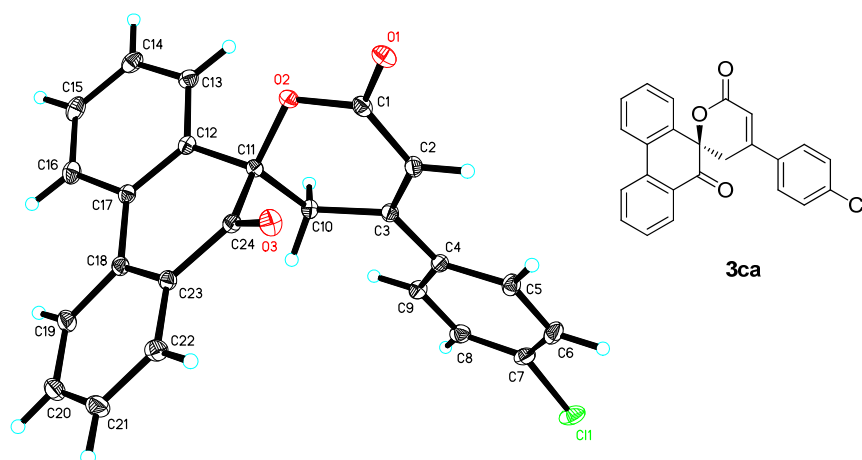

Table 1. Crystal data and structure refinement for **3ca**

|                                 |                                                  |          |
|---------------------------------|--------------------------------------------------|----------|
| Identification code             | mo_dm15338_0m                                    |          |
| Empirical formula               | C <sub>24</sub> H <sub>15</sub> ClO <sub>3</sub> |          |
| Formula weight                  | 386.81                                           |          |
| Temperature                     | 130 K                                            |          |
| Wavelength                      | 0.71073 Å                                        |          |
| Crystal system                  | Orthorhombic                                     |          |
| Space group                     | P 21 21 21                                       |          |
| Unit cell dimensions            | a = 10.5258(9) Å                                 | a = 90°. |
|                                 | b = 11.7582(10) Å                                | b = 90°. |
|                                 | c = 14.4254(12) Å                                | g = 90°. |
| Volume                          | 1785.4(3) Å <sup>3</sup>                         |          |
| Z                               | 4                                                |          |
| Density (calculated)            | 1.439 Mg/m <sup>3</sup>                          |          |
| Absorption coefficient          | 0.238 mm <sup>-1</sup>                           |          |
| F(000)                          | 800                                              |          |
| Crystal size                    | 0.28 x 0.2 x 0.17 mm <sup>3</sup>                |          |
| Theta range for data collection | 2.235 to 30.527°.                                |          |
| Index ranges                    | -15 ≤ h ≤ 14, -14 ≤ k ≤ 16, -20 ≤ l ≤ 20         |          |
| Reflections collected           | 18084                                            |          |
| Independent reflections         | 5459 [R(int) = 0.0255]                           |          |
| Completeness to theta = 25.242° | 100.0 %                                          |          |
| Absorption correction           | Semi-empirical from equivalents                  |          |
| Max. and min. transmission      | 0.7461 and 0.7079                                |          |

|                                   |                                             |
|-----------------------------------|---------------------------------------------|
| Refinement method                 | Full-matrix least-squares on F <sup>2</sup> |
| Data / restraints / parameters    | 5459 / 0 / 253                              |
| Goodness-of-fit on F <sup>2</sup> | 1.045                                       |
| Final R indices [I>2sigma(I)]     | R1 = 0.0349, wR2 = 0.0851                   |
| R indices (all data)              | R1 = 0.0397, wR2 = 0.0885                   |
| Absolute structure parameter      | -0.002(17)                                  |
| Extinction coefficient            | n/a                                         |
| Largest diff. peak and hole       | 0.267 and -0.329 e.Å <sup>-3</sup>          |
